# Supplementary material for: Synthesis, Crystal Structures and Spectroscopic Properties of Triazine-Based Hydrazone Derivatives; A Comparative Experimental-Theoretical Study
Source: PubMed Central journal article supplement (PMC6272468; doi:10.3390/molecules20045851), 2015-04-03
Supplement: molecules-20-05851-s001.pdf [file molecules-20-05851-s001.pdf]

## Supplementary Materials

### Cartesian Coordinates of optimized geometry at B3LYP/6-31G (d, p) (1)

|   |             |             |             |
|---|-------------|-------------|-------------|
| C | 3.19696900  | -1.18947100 | -0.11479500 |
| C | 2.33950900  | -0.05164900 | -0.16975400 |
| C | 0.59856500  | -1.50038200 | -0.30643000 |
| C | 2.78752700  | 1.36261900  | -0.23987600 |
| C | 3.95114700  | 1.73798200  | -0.93139500 |
| C | 1.98366100  | 2.36206800  | 0.33313900  |
| C | 4.30492300  | 3.08110900  | -1.03612200 |
| H | 4.56977600  | 0.98124500  | -1.39986500 |
| C | 2.35039300  | 3.70227700  | 0.24078200  |
| H | 1.07112200  | 2.07482100  | 0.84343500  |
| C | 3.51180600  | 4.06586600  | -0.44369400 |
| H | 5.20024200  | 3.35867900  | -1.58418000 |
| H | 1.72512000  | 4.46342400  | 0.69760100  |
| H | 3.79455800  | 5.11168900  | -0.52051900 |
| C | 4.65206700  | -1.17580900 | 0.18198500  |
| C | 5.51081400  | -2.04730800 | -0.50675000 |
| C | 5.18399100  | -0.36263000 | 1.19587700  |
| C | 6.87043100  | -2.08726300 | -0.20393300 |
| H | 5.09699000  | -2.69340400 | -1.27320200 |
| C | 6.54296100  | -0.40907500 | 1.50008200  |
| H | 4.53038100  | 0.30052900  | 1.75305700  |
| C | 7.39187600  | -1.26729500 | 0.79846300  |
| H | 7.52323800  | -2.76132900 | -0.75085100 |
| H | 6.93771500  | 0.22158000  | 2.29121900  |
| H | 8.45135200  | -1.30013500 | 1.03501100  |
| N | 1.01704000  | -0.23682000 | -0.21723000 |
| N | 1.37988100  | -2.58962700 | -0.46653400 |
| N | 2.67810600  | -2.41301700 | -0.32840000 |
| H | -1.01266900 | -2.74938800 | -0.38051600 |
| C | -2.92449600 | -1.11360300 | -0.12704800 |
| H | -3.21999700 | -2.16274300 | -0.20490000 |
| N | -0.74499500 | -1.77426200 | -0.27995700 |
| N | -1.66932600 | -0.79652000 | -0.15581500 |
| C | -3.95181400 | -0.09899800 | 0.00753500  |
| C | -5.35210500 | -0.45602600 | 0.04782300  |
| C | -3.58936400 | 1.26055600  | 0.10290500  |
| C | -5.82548000 | -1.79337500 | -0.03700100 |
| C | -6.33475600 | 0.57862900  | 0.18139000  |
| C | -4.58220800 | 2.26595800  | 0.23421300  |
| C | -7.17296400 | -2.08695900 | 0.00646800  |

|   |             |             |             |
|---|-------------|-------------|-------------|
| H | -5.12749400 | -2.61655400 | -0.13766400 |
| C | -7.71205400 | 0.24621700  | 0.22287800  |
| C | -5.90847400 | 1.93344700  | 0.27185300  |
| H | -4.24557500 | 3.29479900  | 0.30181700  |
| C | -8.13307600 | -1.06173200 | 0.13743700  |
| H | -7.49598900 | -3.12181200 | -0.06113300 |
| H | -8.43412800 | 1.05235700  | 0.32461200  |
| H | -6.66185100 | 2.71017300  | 0.37236400  |
| H | -9.19042000 | -1.30519700 | 0.17036100  |
| O | -2.31975800 | 1.69150800  | 0.07643300  |
| H | -1.71834000 | 0.90999600  | -0.02875200 |

**Cartesian Co-ordinates of optimized geometry at B3LYP/6-31G (d, p) (2)**

|   |            |             |             |
|---|------------|-------------|-------------|
| C | 2.97758400 | -1.06480900 | -0.09537300 |
| C | 2.00152200 | -0.02876400 | -0.15747600 |
| C | 0.42175000 | -1.65181800 | -0.26638600 |
| C | 2.29672100 | 1.42541900  | -0.24219000 |
| C | 3.39498300 | 1.92055700  | -0.96353700 |
| C | 1.40729700 | 2.33481900  | 0.35282600  |
| C | 3.60249400 | 3.29365700  | -1.07506400 |
| H | 4.07769000 | 1.23259800  | -1.44922900 |
| C | 1.62851000 | 3.70633100  | 0.25465600  |
| H | 0.54415900 | 1.94850900  | 0.88354000  |
| C | 2.72652200 | 4.19004900  | -0.45948800 |
| H | 4.44898800 | 3.66348100  | -1.64586500 |
| H | 0.94003500 | 4.39847000  | 0.73046800  |
| H | 2.89593500 | 5.25978500  | -0.54099400 |
| C | 4.42430900 | -0.89107000 | 0.19121200  |
| C | 5.36809800 | -1.68409600 | -0.48115900 |
| C | 4.87273500 | -0.00090900 | 1.18046700  |
| C | 6.72560600 | -1.57267600 | -0.18689900 |
| H | 5.02178700 | -2.39013800 | -1.22797300 |
| C | 6.23034700 | 0.10482800  | 1.47589800  |
| H | 4.15529700 | 0.60311100  | 1.72605700  |
| C | 7.16250200 | -0.67647100 | 0.79044800  |
| H | 7.44338600 | -2.18826500 | -0.72135700 |
| H | 6.55915600 | 0.79412400  | 2.24814100  |
| H | 8.22059700 | -0.59109000 | 1.02007300  |
| N | 0.70595200 | -0.35014300 | -0.19525400 |
| N | 1.31879700 | -2.65316100 | -0.41897300 |
| N | 2.59064900 | -2.33934600 | -0.29159500 |

|   |             |             |             |
|---|-------------|-------------|-------------|
| H | -1.00728200 | -3.08845300 | -0.32895800 |
| C | -3.10493300 | -1.77478900 | -0.13127900 |
| H | -3.23685800 | -2.86304800 | -0.21367200 |
| N | -0.87856100 | -2.08342300 | -0.23101400 |
| N | -1.93255400 | -1.24324100 | -0.12873300 |
| C | -4.31923400 | -0.97297700 | -0.02781900 |
| C | -5.56954600 | -1.60360300 | -0.02722200 |
| C | -4.28137000 | 0.43414800  | 0.07092300  |
| C | -6.75572300 | -0.87470200 | 0.06817100  |
| C | -5.44944500 | 1.16741600  | 0.16610200  |
| C | -6.69875800 | 0.51990100  | 0.16571200  |
| H | -5.43100400 | 2.24966400  | 0.24124700  |
| H | -5.62205800 | -2.68703500 | -0.10272300 |
| H | -7.70431700 | -1.39760000 | 0.06539900  |
| O | -7.78448500 | 1.33702700  | 0.26308100  |
| C | -9.07539300 | 0.74585000  | 0.26445200  |
| H | -9.20874500 | 0.06843200  | 1.11734300  |
| H | -9.78381100 | 1.57104100  | 0.34719600  |
| H | -9.26874300 | 0.19548300  | -0.66497600 |
| H | -3.31778200 | 0.93216900  | 0.06876700  |

**Cartesian Co-ordinates of optimized geometry at B3LYP/6-31G (d, p) (3)**

|   |            |             |             |
|---|------------|-------------|-------------|
| C | 3.33597000 | -1.04160900 | -0.08827100 |
| C | 2.32521000 | -0.04079300 | -0.15910700 |
| C | 0.80016200 | -1.71692300 | -0.25983700 |
| C | 2.57097100 | 1.42248800  | -0.25338100 |
| C | 3.65237500 | 1.95027900  | -0.97687100 |
| C | 1.65039600 | 2.30506000  | 0.33439100  |
| C | 3.81324200 | 3.32893800  | -1.09734100 |
| H | 4.35884400 | 1.28287600  | -1.45728900 |
| C | 1.82473800 | 3.68271400  | 0.22718200  |
| H | 0.79989300 | 1.89275300  | 0.86596800  |
| C | 2.90651300 | 4.19913900  | -0.48884000 |
| H | 4.64748400 | 3.72348000  | -1.66970800 |
| H | 1.11226500 | 4.35403300  | 0.69761100  |
| H | 3.03953500 | 5.27349900  | -0.57725700 |
| C | 4.77538500 | -0.81768000 | 0.19963500  |
| C | 5.74649700 | -1.58419700 | -0.46481000 |
| C | 5.19299300 | 0.09463800  | 1.18220800  |
| C | 7.09908400 | -1.42553000 | -0.16969000 |
| H | 5.42491800 | -2.30754200 | -1.20610500 |

|   |             |             |             |
|---|-------------|-------------|-------------|
| C | 6.54596200  | 0.24821600  | 1.47818700  |
| H | 4.45504800  | 0.67834000  | 1.72253700  |
| C | 7.50478000  | -0.50718900 | 0.80053800  |
| H | 7.83764900  | -2.02151500 | -0.69810700 |
| H | 6.85036700  | 0.95445600  | 2.24517100  |
| H | 8.55913100  | -0.38479300 | 1.03075600  |
| N | 1.04136600  | -0.40508300 | -0.19829700 |
| N | 1.73349900  | -2.68818200 | -0.40587700 |
| N | 2.99253900  | -2.33013900 | -0.27862900 |
| H | -0.57574400 | -3.20121400 | -0.31434900 |
| C | -2.71834100 | -1.96866600 | -0.12744500 |
| H | -2.80075900 | -3.06259800 | -0.20588100 |
| N | -0.48193200 | -2.19184300 | -0.22177800 |
| N | -1.56820100 | -1.38797800 | -0.12467600 |
| C | -3.96726900 | -1.22781300 | -0.02975200 |
| C | -5.19222500 | -1.91261200 | -0.03359300 |
| C | -4.00789300 | 0.17600800  | 0.06316900  |
| C | -6.40517500 | -1.24306100 | 0.05462700  |
| H | -5.19693300 | -2.99749700 | -0.11173100 |
| C | -5.20904300 | 0.85760700  | 0.15270600  |
| H | -3.07250400 | 0.72590800  | 0.05826400  |
| C | -6.44814800 | 0.16669100  | 0.16071700  |
| H | -7.32095900 | -1.82030600 | 0.04008000  |
| H | -5.18830000 | 1.93847700  | 0.21469500  |
| C | -7.66726900 | 2.29774300  | 0.22333800  |
| H | -8.69242500 | 2.64662700  | 0.35304700  |
| H | -7.06629800 | 2.73069600  | 1.03152800  |
| H | -7.28869000 | 2.69497300  | -0.73044800 |
| C | -8.90035400 | 0.12301100  | 0.12520600  |
| H | -8.99411000 | -0.66715200 | 0.87961400  |
| H | -9.73208300 | 0.81393600  | 0.26731800  |
| H | -9.00655500 | -0.34191300 | -0.86659400 |
| N | -7.64886300 | 0.84547100  | 0.27398400  |

**Cartesian Co-ordinates of optimized geometry at B3LYP/6-31G (d, p) (4)**

|   |             |             |             |
|---|-------------|-------------|-------------|
| C | 2.33411600  | -1.13082900 | -0.11277400 |
| C | 1.36791600  | -0.08347600 | -0.16627100 |
| C | -0.22262500 | -1.69677700 | -0.27897700 |
| C | 1.67422800  | 1.36742200  | -0.24721200 |
| C | 2.77808800  | 1.85213500  | -0.96789600 |
| C | 0.79149800  | 2.28521100  | 0.34571600  |

|   |             |             |             |
|---|-------------|-------------|-------------|
| C | 2.99683500  | 3.22303000  | -1.08155600 |
| H | 3.45532100  | 1.15797800  | -1.45226200 |
| C | 1.02414100  | 3.65452500  | 0.24476400  |
| H | -0.07595600 | 1.91192400  | 0.87857200  |
| C | 2.12701000  | 4.12750100  | -0.46889500 |
| H | 3.84686200  | 3.58488400  | -1.65209400 |
| H | 0.33950800  | 4.35237300  | 0.71724600  |
| H | 2.30478600  | 5.19563300  | -0.55280700 |
| C | 3.78292500  | -0.97037000 | 0.17134100  |
| C | 4.71860800  | -1.76567200 | -0.50930400 |
| C | 4.23925900  | -0.09137300 | 1.16687100  |
| C | 6.07743800  | -1.66711100 | -0.21656300 |
| H | 4.36569100  | -2.46282400 | -1.26135100 |
| C | 5.59804800  | 0.00076500  | 1.46107700  |
| H | 3.52760000  | 0.51440800  | 1.71805900  |
| C | 6.52259600  | -0.78246900 | 0.76752400  |
| H | 6.78953600  | -2.28378400 | -0.75718200 |
| H | 5.93373200  | 0.68100700  | 2.23827000  |
| H | 7.58165100  | -0.70739300 | 0.99610800  |
| N | 0.06976800  | -0.39784000 | -0.19972800 |
| N | 0.66028600  | -2.70480900 | -0.43797400 |
| N | 1.93645400  | -2.40087900 | -0.31244800 |
| H | -1.70283300 | -3.09955400 | -0.34277800 |
| C | -3.76503400 | -1.65600200 | -0.09715800 |
| H | -3.98847200 | -2.72678900 | -0.18127500 |
| N | -1.53343800 | -2.10242200 | -0.24376700 |
| N | -2.54894500 | -1.22138200 | -0.11910700 |
| C | -4.88434700 | -0.74286500 | 0.04263000  |
| C | -6.19635300 | -1.25410500 | 0.06415800  |
| C | -4.69486100 | 0.66243100  | 0.16276200  |
| C | -7.29692600 | -0.42086800 | 0.20037900  |
| C | -5.81341500 | 1.49637400  | 0.30085400  |
| C | -7.09554700 | 0.96083200  | 0.31944600  |
| H | -5.64343800 | 2.56404500  | 0.39049100  |
| H | -7.94826500 | 1.62501800  | 0.42690800  |
| O | -3.47823900 | 1.23777000  | 0.15006400  |
| H | -2.79512900 | 0.53595300  | 0.03285300  |
| H | -6.33549300 | -2.32870500 | -0.02847200 |
| H | -8.29965400 | -0.83485800 | 0.21487100  |

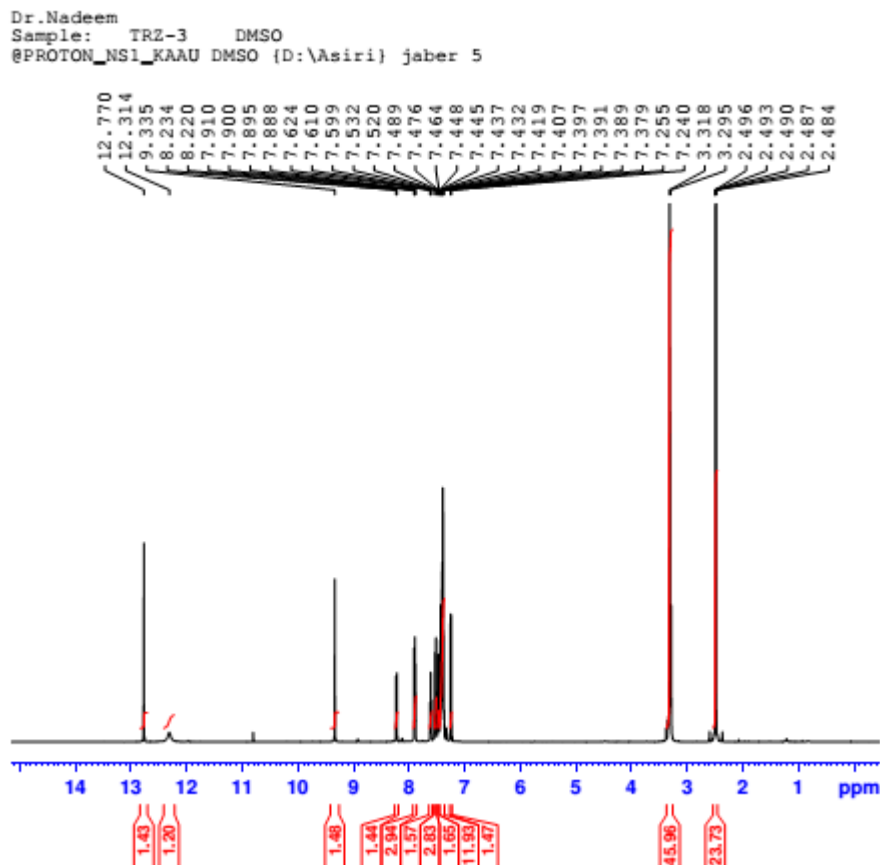

**Figure S1.** Experimental  $^1\text{H}$ -NMR spectrum of **1** measured in  $d_6$ -DMSO.

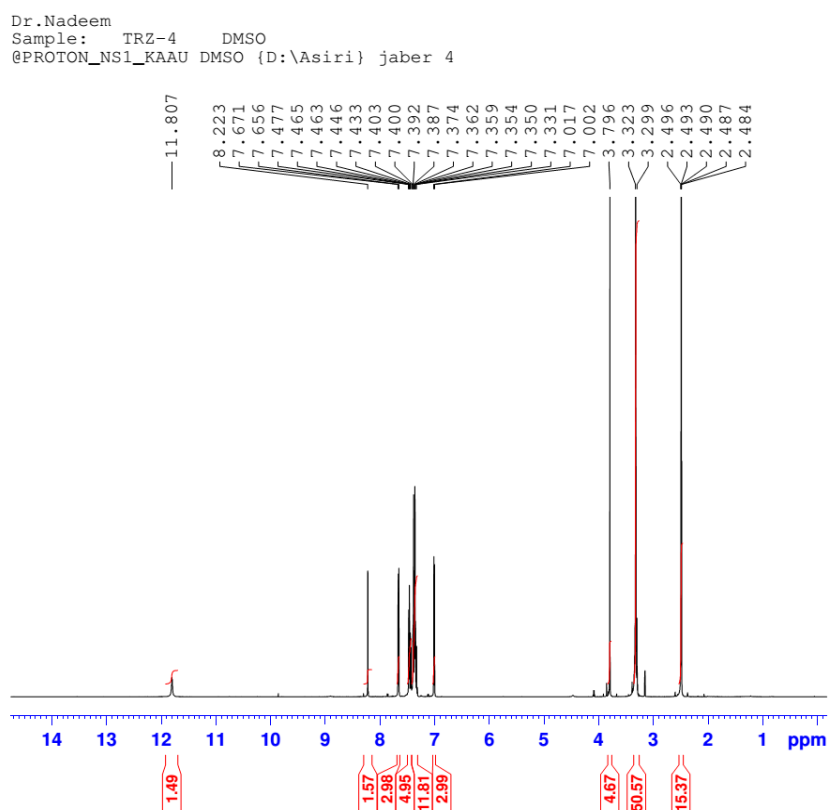

**Figure S2.** Experimental  $^1\text{H}$ -NMR spectrum of **2** measured in  $d_6$ -DMSO.

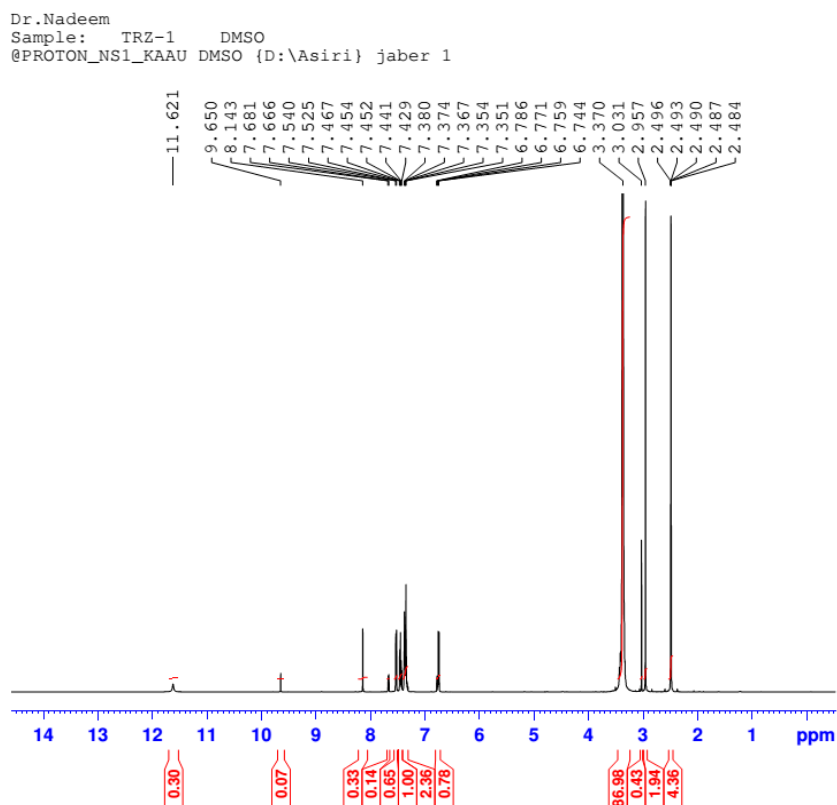

**Figure S3.** Experimental  $^1\text{H-NMR}$  spectrum of **3** measured in  $d_6\text{-DMSO}$ .

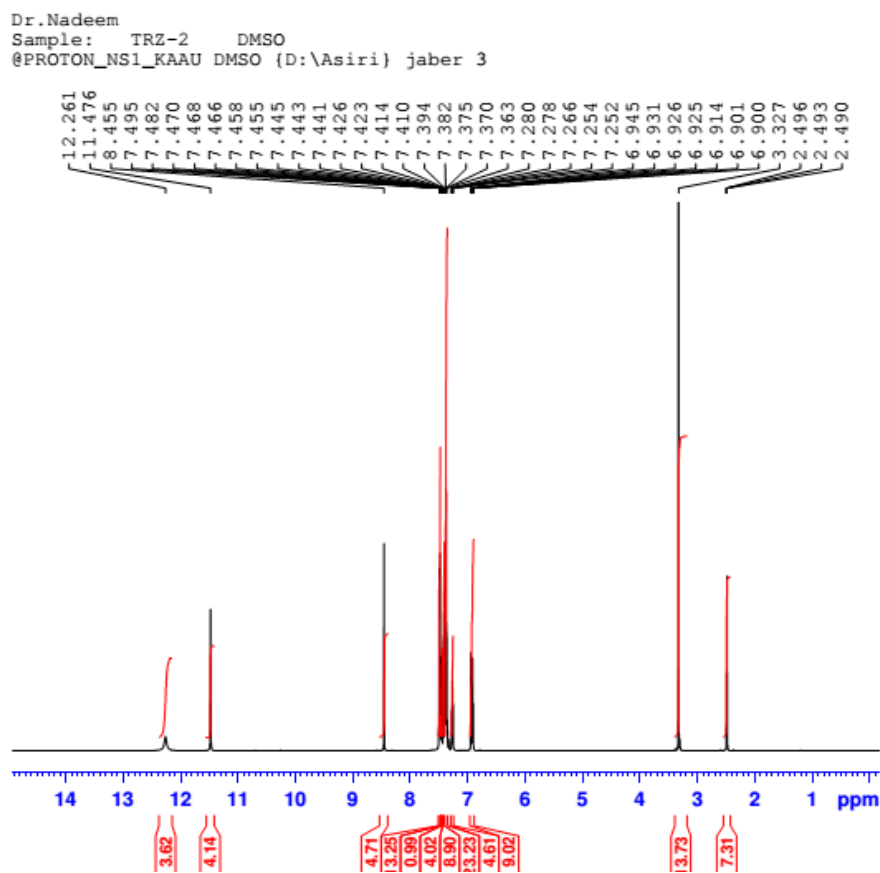

**Figure S4.** Experimental  $^1\text{H-NMR}$  spectrum of **4** measured in  $d_6\text{-DMSO}$ .

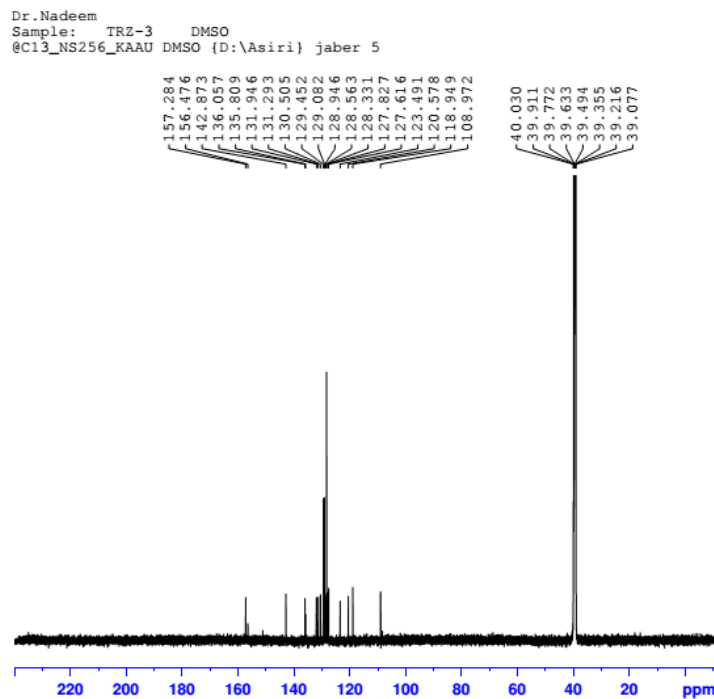

Figure S5. Experimental  $^{13}\text{C}$ -NMR spectrum of **1** measured in  $d_6$ -DMSO.

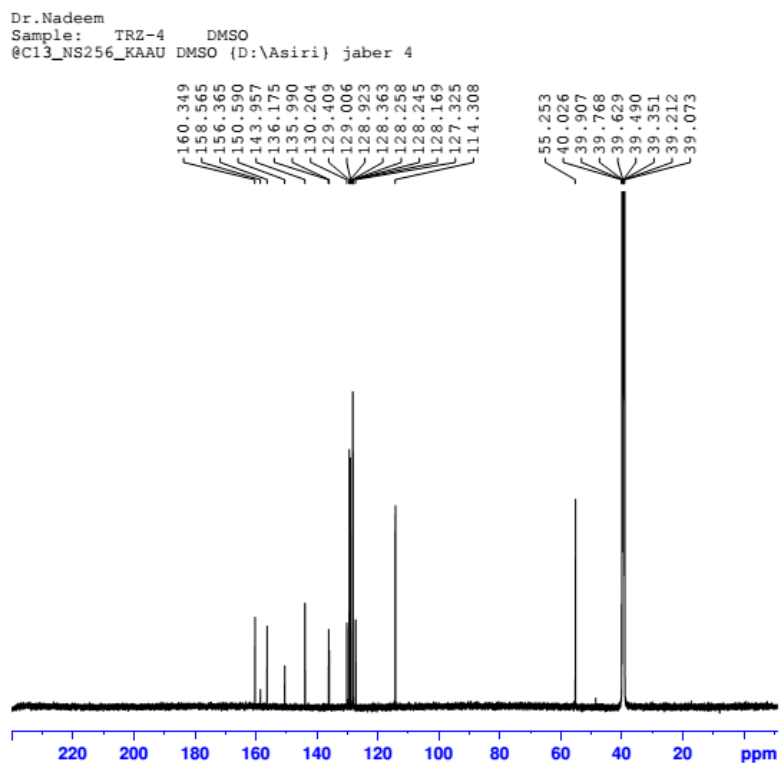

Figure S6. Experimental  $^{13}\text{C}$ -NMR spectrum of **2** measured in  $d_6$ -DMSO.



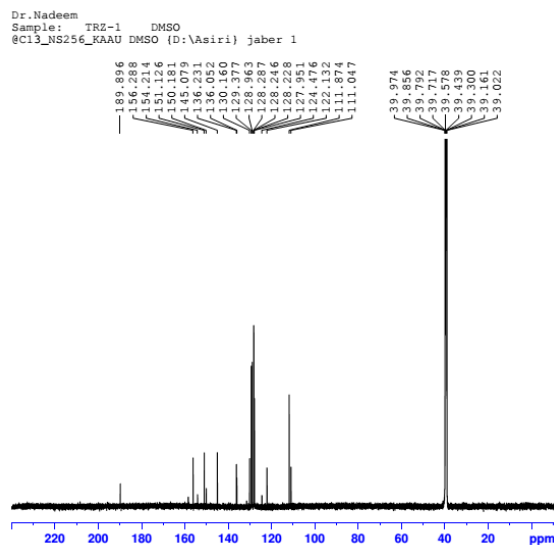

**Figure S7.** Experimental  $^{13}\text{C}$ -NMR spectrum of **3** measured in  $d_6$ -DMSO.

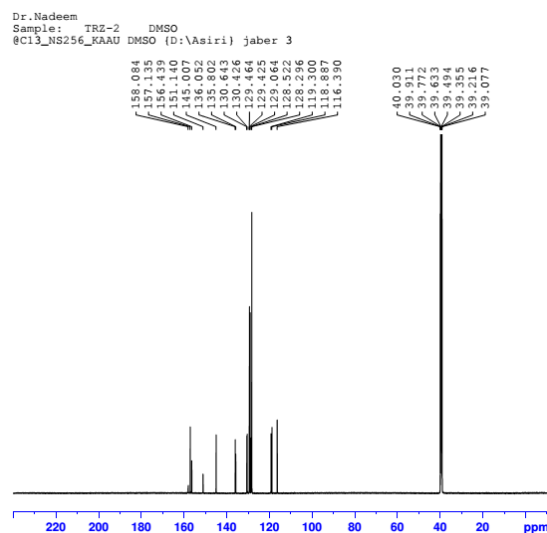

**Figure S8.** Experimental  $^{13}\text{C}$ -NMR spectrum of **4** measured in  $d_6$ -DMSO.

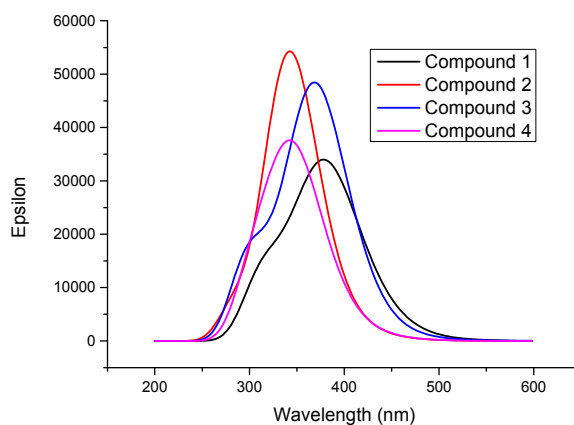

**Figure S9.** Combined simulated UV-vis. spectra of (**1–4**) measured at TD-B3LYP/6-31G (d, p) level in gas phase.

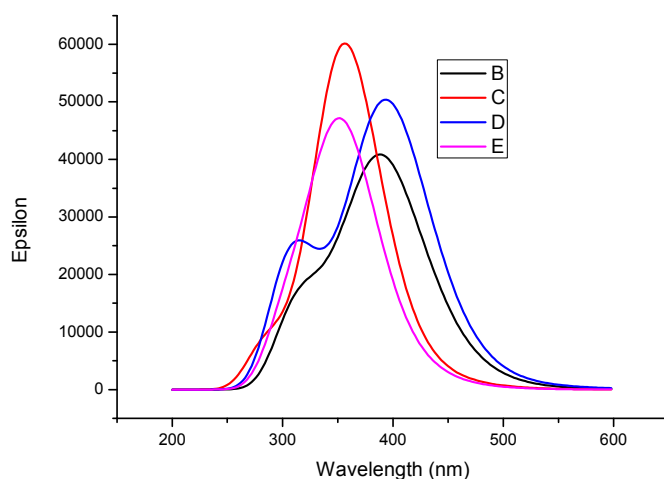

**Figure S10.** Combined simulated UV-vis. spectra of Compounds (1–4) measured at TD-B3LYP/6-31G (d, p) level measured in DMSO.

### Molecule 1Cif

data\_c:\nadeem

```

_audit_creation_method      SHELXL-97
_chemical_name_systematic
;
1-[(5,6-Diphenyl-[1,2,4]triazin-3-yl)-hydrazonomethyl]-naphthalen-2-ol
;
_chemical_name_common
;
1-[(5,6-Diphenyl-[1,2,4]triazin-3-yl)-hydrazonomethyl]-naphthalen-2-ol
;
_chemical_melting_point     ?
_chemical_formula_moiety    'C26H19N5 O'
_chemical_formula_sum
'C26H19N5 O'
_chemical_formula_weight    417.46

loop_
_atom_type_symbol
_atom_type_description
_atom_type_scatter_dispersion_real
_atom_type_scatter_dispersion_imag
_atom_type_scatter_source
'C' 'C' 0.0181 0.0091
'International Tables VolC Tables 4.2.6.8 and 6.1.1.4'
```

'H' 'H' 0.0000 0.0000  
 'International Tables VolC Tables 4.2.6.8 and 6.1.1.4'  
 'N' 'N' 0.0311 0.0180  
 'International Tables VolC Tables 4.2.6.8 and 6.1.1.4'  
 'O' 'O' 0.0492 0.0322  
 'International Tables VolC Tables 4.2.6.8 and 6.1.1.4'

\_symmetry\_cell\_setting 'Monoclinic'  
 \_symmetry\_space\_group\_name\_H-M 'P2 1/n'  
 \_symmetry\_space\_group\_name\_Hall '-P2yn'

loop\_

\_symmetry\_equiv\_pos\_as\_xyz  
 'x, y, z'  
 '-x+1/2, y+1/2, -z+1/2'  
 '-x, -y, -z'  
 'x-1/2, -y-1/2, z-1/2'

\_cell\_length\_a 6.5745(2)  
 \_cell\_length\_b 19.9133(6)  
 \_cell\_length\_c 15.9805(5)  
 \_cell\_angle\_alpha 90.00  
 \_cell\_angle\_beta 96.369(3)  
 \_cell\_angle\_gamma 90.00  
 \_cell\_volume 2079.25(11)  
 \_cell\_formula\_units\_Z 4  
 \_cell\_measurement\_temperature 296(2)  
 \_cell\_measurement\_reflns\_used 4636  
 \_cell\_measurement\_theta\_min 3.5567  
 \_cell\_measurement\_theta\_max 75.8131  
 \_exptl\_crystal\_description 'rod'  
 \_exptl\_crystal\_colour 'orange'  
 \_exptl\_crystal\_size\_max 0.48  
 \_exptl\_crystal\_size\_mid 0.16  
 \_exptl\_crystal\_size\_min 0.15  
 \_exptl\_crystal\_density\_meas ?  
 \_exptl\_crystal\_density\_diffn 1.334  
 \_exptl\_crystal\_density\_method 'not measured'  
 \_exptl\_crystal\_F\_000 872  
 \_exptl\_absorpt\_coefficient\_mu 0.677  
 \_exptl\_absorpt\_correction\_T\_min 0.71210  
 \_exptl\_absorpt\_correction\_T\_max 1.00000

```

_exptl_absorpt_correction_type      'multi-scan'
_exptl_absorpt_process_details
;
CrysAlisPro, Agilent Technologies,
Version 1.171.36.20 (release 27-06-2012CrysAlis171 .NET)
(compiled Jul 11 2012,15:38:31)
Empirical absorptionCorrection using sphericalHarmonics,
implemented in SCALE3 ABSPACK scaling algorithm.
;

_exptl_special_details              ?

_diffn_ambient_temperature          296(2)
_diffn_radiation_wavelength         1.54184
_diffn_radiation_type                CuK\alpha
_diffn_radiation_source              'fine-focus sealed tube'
_diffn_radiation_monochromator       graphite
_diffn_measurement_device_type       'SuperNova, Dual,Cu at zero, Atlas,CCD'
_diffn_measurement_method            '\w scans'
_diffn_detector_area_resol_mean     ?
_diffn_standards_number              0
_diffn_standards_interval_count      .
_diffn_standards_interval_time      .
_diffn_standards_decay_%             ?
_diffn_reflns_number                 12339
_diffn_reflns_av_R_equivalents       0.0185
_diffn_reflns_av_sigmaI/netI        0.0160
_diffn_reflns_limit_h_min            -6
_diffn_reflns_limit_h_max            8
_diffn_reflns_limit_k_min            -25
_diffn_reflns_limit_k_max            21
_diffn_reflns_limit_l_min            -20
_diffn_reflns_limit_l_max            19
_diffn_reflns_theta_min              3.56
_diffn_reflns_theta_max              76.00
_reflns_number_total                  4304
_reflns_number_gt                     3378
_reflns_threshold_expression          >2sigma(I)

_computing_data_collection           'CrysAlis PRO (Agilent, 2012)'
_computing_cell_refinement           'CrysAlis PRO (Agilent, 2012)'
_computing_data_reduction            'CrysAlis PRO (Agilent, 2012)'

```

```

_computing_structure_solution 'SHELXS-97 (Sheldrick, 1990)'
_computing_structure_refinement 'SHELXL-97 (Sheldrick, 1997)'
_computing_molecular_graphics ?
_computing_publication_material ?

_iucr_refine_instructions_details
;
TITL 14040 in P2(1)/n
CELL 1.54184 6.5745 19.9133 15.9805 90.000 96.369 90.000
ZERR 4.0000 0.0002 0.0006 0.0005 0.000 0.003 0.000
LATT 1
SYMM 0.5-X, 0.5+Y, 0.5-Z
SFACCHN O
UNIT 104 76 20 4
MERG 2
FMAP 2
GRID
PLAN 20
TEMP 23
SIZE 0.48 0.16 0.15
BOND $H
HTAB
CONF
L.S. 15
ACTA 52
WGHT 0.06050 0.31320 0.00000 0.00000 0.00000 0.33330
FVAR 5.19820
N1  3  0.65264  0.03442  0.14503 11.00000  0.05845  0.05648 =
    0.04739 -0.00239  0.01050  0.00118
C2  1  0.68311  0.00284  0.21855 11.00000  0.05185  0.04894 =
    0.04712 -0.00394  0.00665 -0.00510
N2  3  0.94170 -0.02273  0.10197 11.00000  0.06634  0.06351 =
    0.05186  0.00111  0.01592  0.00687
N3  3  0.96464 -0.05728  0.17355 11.00000  0.06178  0.05772 =
    0.05537 -0.00058  0.01294  0.00388
N5  3  0.60803  0.09574 -0.00542 11.00000  0.06318  0.06522 =
    0.05439 -0.00340  0.01108  0.00839
N4  3  0.75933  0.04938  0.01218 11.00000  0.07255  0.07502 =
    0.05289  0.00850  0.01935  0.01977
C16 1  0.60562  0.12956 -0.07406 11.00000  0.05662  0.05982 =
    0.05149 -0.00593  0.00817  0.00423
AFIX 43

```

H16 2 0.70769 0.12283 -0.10909 11.00000 -1.20000  
 AFIX 0  
 C17 1 0.44474 0.17814 -0.09724 11.00000 0.05206 0.05525 =  
 0.06199 -0.01641 0.00025 0.00187  
 O1 4 0.26256 0.14727 0.01996 11.00000 0.07524 0.09976 =  
 0.08665 -0.01813 0.02980 0.00230  
 C3 1 0.83687 -0.04733 0.23186 11.00000 0.05265 0.05078 =  
 0.04977 -0.00361 0.00787 -0.00290  
 C1 1 0.78237 0.01918 0.08875 11.00000 0.06045 0.05600 =  
 0.04846 -0.00303 0.01089 0.00130  
 C10 1 0.87174 -0.09157 0.30699 11.00000 0.06036 0.04663 =  
 0.05235 -0.00234 0.00782 0.00138  
 C4 1 0.55179 0.02649 0.28247 11.00000 0.06050 0.04692 =  
 0.05020 -0.00025 0.01421 -0.00241  
 C22 1 0.45290 0.22129 -0.16932 11.00000 0.06078 0.04820 =  
 0.06547 -0.01198 -0.01089 0.00379  
 C15 1 1.06929 -0.10474 0.34288 11.00000 0.06098 0.07059 =  
 0.07676 0.01028 0.00792 0.00616  
 AFIX 43  
 H15 2 1.17982 -0.08493 0.32082 11.00000 -1.20000  
 AFIX 0  
 C11 1 0.71025 -0.12195 0.34051 11.00000 0.06394 0.05434 =  
 0.05893 -0.00102 0.00811 -0.00285  
 AFIX 43  
 H11 2 0.57684 -0.11354 0.31706 11.00000 -1.20000  
 AFIX 0  
 C21 1 0.28750 0.26597 -0.19321 11.00000 0.06510 0.05507 =  
 0.09240 -0.01992 -0.01384 0.00837  
 C9 1 0.62712 0.03353 0.36682 11.00000 0.08251 0.05689 =  
 0.05299 -0.00217 0.00973 0.00318  
 AFIX 43  
 H9 2 0.76115 0.02132 0.38527 11.00000 -1.20000  
 AFIX 0  
 C23 1 0.61896 0.22284 -0.21813 11.00000 0.06597 0.05851 =  
 0.06810 -0.00148 -0.00348 0.00258  
 AFIX 43  
 H23 2 0.73035 0.19471 -0.20388 11.00000 -1.20000  
 AFIX 0  
 C5 1 0.35235 0.04602 0.25593 11.00000 0.06013 0.06297 =  
 0.06367 0.00198 0.01554 -0.00088  
 AFIX 43  
 H5 2 0.30247 0.04287 0.19929 11.00000 -1.20000

AFIX 0

C18 1 0.27932 0.18373 -0.05053 11.00000 0.05927 0.06991 =  
0.07449 -0.02360 0.00956 -0.00230

C19 1 0.11700 0.22897 -0.07540 11.00000 0.05551 0.08524 =  
0.11061 -0.03928 0.01213 0.00461

AFIX 43

H19 2 0.00602 0.23186 -0.04421 11.00000 -1.20000

AFIX 0

C12 1 0.74536 -0.16476 0.40862 11.00000 0.08891 0.05719 =  
0.06847 0.00651 0.02176 -0.00066

AFIX 43

H12 2 0.63565 -0.18523 0.43051 11.00000 -1.20000

AFIX 0

C24 1 0.62003 0.26500 -0.28631 11.00000 0.09234 0.06469 =  
0.07831 0.00716 -0.00299 -0.00408

AFIX 43

H24 2 0.73275 0.26534 -0.31670 11.00000 -1.20000

AFIX 0

C6 1 0.22776 0.07007 0.31319 11.00000 0.06948 0.07181 =  
0.09393 0.00400 0.03362 0.00546

AFIX 43

H6 2 0.09361 0.08245 0.29521 11.00000 -1.20000

AFIX 0

C26 1 0.29389 0.30726 -0.26564 11.00000 0.09873 0.05040 =  
0.10238 -0.00167 -0.03025 0.01510

AFIX 43

H26 2 0.18335 0.33513 -0.28242 11.00000 -1.20000

AFIX 0

C20 1 0.12352 0.26795 -0.14449 11.00000 0.06813 0.06830 =  
0.11506 -0.02553 -0.01397 0.01567

AFIX 43

H20 2 0.01525 0.29704 -0.16007 11.00000 -1.20000

AFIX 0

C14 1 1.10248 -0.14725 0.41141 11.00000 0.07616 0.08202 =  
0.08226 0.01401 -0.00047 0.01825

AFIX 43

H14 2 1.23541 -0.15558 0.43552 11.00000 -1.20000

AFIX 0

C7 1 0.30152 0.07574 0.39652 11.00000 0.10837 0.06968 =  
0.08312 -0.00576 0.04938 0.00348

AFIX 43

H7 2 0.21637 0.09105 0.43519 11.00000 -1.20000

```

AFIX 0
C8  1  0.50102  0.05887  0.42313  11.00000  0.12174  0.06718 =
    0.05460 -0.00545  0.02563  0.00032
AFIX 43
H8  2  0.55165  0.06451  0.47938  11.00000 -1.20000
AFIX 0
C13 1  0.94141 -0.17718  0.44405  11.00000  0.10531  0.06408 =
    0.06807  0.01568  0.01221  0.01992
AFIX 43
H13 2  0.96473 -0.20582  0.49008  11.00000 -1.20000
AFIX 0
C25 1  0.45545  0.30703 -0.31044  11.00000  0.11083  0.06160 =
    0.09242  0.00879 -0.01289  0.00479
AFIX 43
H25 2  0.45689  0.33479 -0.35717  11.00000 -1.20000
H2  2  0.86974  0.04137 -0.02193  11.00000  0.08658
H1  2  0.39354  0.11887  0.03188  11.00000  0.12375
HKLF 4

```

```

;
_refine_special_details

```

Refinement of  $F^2$  against ALL reflections. The weighted R-factor  $wR$  and goodness of fit  $S$  are based on  $F^2$ , Conventional R-factors  $R$  are based on  $F$ , with  $F$  set to zero for Negative  $F^2$ . The threshold expression of  $F^2 > 2\sigma(F^2)$  is used only for Calculating R-factors(gt) etc. and is Not relevant to the Choice of reflections for refinement. R-factors based on  $F^2$  are statistically about twice as large as those based on  $F$ , and R-factors based on ALL data will be even larger.

```

;
_refine_ls_structure_factor_coef Fsqd
_refine_ls_matrix_type      full
_refine_ls_weighting_scheme Calc
_refine_ls_weighting_details
'calc w=1/[s^2*(Fo^2)+(0.0605P)^2+0.3132P] where P=(Fo^2+2Fc^2)/3'
_atom_sites_solution_primary direct
_atom_sites_solution_secondary difmap
_atom_sites_solution_hydrogens geom
_refine_ls_hydrogen_treatment Constr
_refine_ls_extinction_method None
_refine_ls_extinction_coef  ?
_refine_ls_number_reflns    4304

```



```

_refine_ls_number_parameters    291
_refine_ls_number_restraints    0
_refine_ls_R_factor_all         0.0546
_refine_ls_R_factor_gt         0.0428
_refine_ls_wR_factor_ref       0.1273
_refine_ls_wR_factor_gt       0.1156
_refine_ls_goodness_of_fit_ref  1.034
_refine_ls_restrained_S_all    1.034
_refine_ls_shift/su_max        0.000
_refine_ls_shift/su_mean       0.000

```

loop\_

```

_atom_site_label
_atom_site_type_symbol
_atom_site_fract_x
_atom_site_fract_y
_atom_site_fract_z
_atom_site_U_iso_or_equiv
_atom_site_adp_type
_atom_site_occupancy
_atom_site_symmetry_multiplicity
_atom_site_calc_flag
_atom_site_refinement_flags
_atom_site_disorder_assembly
_atom_site_disorder_group
N1N 0.65264(18) 0.03442(6) 0.14503(7) 0.0538(3) Uani 1 1 d . . .
C2C 0.6831(2) 0.00284(7) 0.21855(8) 0.0492(3) Uani 1 1 d . . .
N2N 0.9417(2) -0.02273(7) 0.10197(8) 0.0599(3) Uani 1 1 d . . .
N3N 0.96465(19) -0.05728(6) 0.17355(8) 0.0578(3) Uani 1 1 d . . .
N5N 0.6080(2) 0.09574(7) -0.00542(8) 0.0606(3) Uani 1 1 d . . .
N4N 0.7593(2) 0.04938(7) 0.01218(8) 0.0659(4) Uani 1 1 d . . .
C16C 0.6056(2) 0.12956(8) -0.07406(9) 0.0558(3) Uani 1 1 d . . .
H16H 0.7077 0.1228 -0.1091 0.067 Uiso 1 1 Calc R . .
C17C 0.4447(2) 0.17814(8) -0.09724(10) 0.0569(4) Uani 1 1 d . . .
O1 O 0.2626(2) 0.14727(8) 0.01996(9) 0.0857(4) Uani 1 1 d . . .
C3C 0.8369(2) -0.04733(7) 0.23186(9) 0.0509(3) Uani 1 1 d . . .
C1C 0.7824(2) 0.01918(8) 0.08875(9) 0.0546(3) Uani 1 1 d . . .
C10C 0.8717(2) -0.09157(7) 0.30699(9) 0.0530(3) Uani 1 1 d . . .
C4C 0.5518(2) 0.02649(7) 0.28247(9) 0.0519(3) Uani 1 1 d . . .
C22C 0.4529(2) 0.22129(7) -0.16932(10) 0.0595(4) Uani 1 1 d . . .
C15C 1.0693(3) -0.10474(9) 0.34288(11) 0.0694(4) Uani 1 1 d . . .
H15H 1.1798 -0.0849 0.3208 0.083 Uiso 1 1 Calc R . .

```

C11C 0.7102(2) -0.12195(8) 0.34051(10) 0.0590(4) Uani 1 1 d . . .  
H11H 0.5768 -0.1135 0.3171 0.071 Uiso 1 1Calc R . .  
C21C 0.2875(3) 0.26597(8) -0.19321(12) 0.0725(5) Uani 1 1 d . . .  
C9C 0.6271(3) 0.03353(8) 0.36682(10) 0.0640(4) Uani 1 1 d . . .  
H9H 0.7612 0.0213 0.3853 0.077 Uiso 1 1Calc R . .  
C23C 0.6190(3) 0.22284(8) -0.21812(10) 0.0650(4) Uani 1 1 d . . .  
H23H 0.7303 0.1947 -0.2039 0.078 Uiso 1 1Calc R . .  
C5C 0.3524(2) 0.04601(8) 0.25593(11) 0.0616(4) Uani 1 1 d . . .  
H5H 0.3025 0.0429 0.1993 0.074 Uiso 1 1Calc R . .  
C18C 0.2793(2) 0.18373(9) -0.05053(11) 0.0677(4) Uani 1 1 d . . .  
C19C 0.1170(3) 0.22897(11) -0.07540(15) 0.0836(6) Uani 1 1 d . . .  
H19H 0.0060 0.2319 -0.0442 0.100 Uiso 1 1Calc R . .  
C12C 0.7454(3) -0.16476(9) 0.40862(11) 0.0705(4) Uani 1 1 d . . .  
H12H 0.6356 -0.1852 0.4305 0.085 Uiso 1 1Calc R . .  
C24C 0.6200(3) 0.26500(9) -0.28631(12) 0.0794(5) Uani 1 1 d . . .  
H24H 0.7328 0.2653 -0.3167 0.095 Uiso 1 1Calc R . .  
C6C 0.2278(3) 0.07007(9) 0.31319(13) 0.0766(5) Uani 1 1 d . . .  
H6H 0.0936 0.0824 0.2952 0.092 Uiso 1 1Calc R . .  
C26C 0.2939(4) 0.30726(9) -0.26564(14) 0.0869(6) Uani 1 1 d . . .  
H26H 0.1834 0.3351 -0.2824 0.104 Uiso 1 1Calc R . .  
C20C 0.1235(3) 0.26795(10) -0.14449(15) 0.0856(6) Uani 1 1 d . . .  
H20H 0.0153 0.2970 -0.1601 0.103 Uiso 1 1Calc R . .  
C14C 1.1025(3) -0.14725(10) 0.41141(12) 0.0808(5) Uani 1 1 d . . .  
H14H 1.2354 -0.1556 0.4355 0.097 Uiso 1 1Calc R . .  
C7C 0.3015(4) 0.07574(10) 0.39652(13) 0.0842(6) Uani 1 1 d . . .  
H7H 0.2164 0.0911 0.4352 0.101 Uiso 1 1Calc R . .  
C8C 0.5010(4) 0.05887(9) 0.42313(11) 0.0800(5) Uani 1 1 d . . .  
H8H 0.5517 0.0645 0.4794 0.096 Uiso 1 1Calc R . .  
C13C 0.9414(3) -0.17718(9) 0.44406(12) 0.0790(5) Uani 1 1 d . . .  
H13H 0.9647 -0.2058 0.4901 0.095 Uiso 1 1Calc R . .  
C25C 0.4555(4) 0.30703(10) -0.31044(14) 0.0901(6) Uani 1 1 d . . .  
H25H 0.4569 0.3348 -0.3572 0.108 Uiso 1 1Calc R . .  
H2H 0.8697 0.0414 -0.0219 0.087(6) Uiso 1 1 d R . .  
H1H 0.3935 0.1189 0.0319 0.124(9) Uiso 1 1 d R . .

loop\_

\_atom\_site\_aniso\_label  
\_atom\_site\_aniso\_U\_11  
\_atom\_site\_aniso\_U\_22  
\_atom\_site\_aniso\_U\_33  
\_atom\_site\_aniso\_U\_23  
\_atom\_site\_aniso\_U\_13

\_atom\_site\_aniso\_U\_12

N1 0.0584(6) 0.0565(7) 0.0474(6) -0.0024(5) 0.0105(5) 0.0012(5)  
 C2 0.0519(7) 0.0489(7) 0.0471(7) -0.0039(6) 0.0066(5) -0.0051(6)  
 N2 0.0663(7) 0.0635(7) 0.0519(7) 0.0011(6) 0.0159(5) 0.0069(6)  
 N3 0.0618(7) 0.0577(7) 0.0554(7) -0.0006(6) 0.0129(5) 0.0039(6)  
 N5 0.0632(7) 0.0652(8) 0.0544(7) -0.0034(6) 0.0111(5) 0.0084(6)  
 N4 0.0725(8) 0.0750(9) 0.0529(7) 0.0085(6) 0.0193(6) 0.0198(7)  
 C16 0.0566(8) 0.0598(8) 0.0515(8) -0.0059(6) 0.0082(6) 0.0042(7)  
 C17 0.0521(7) 0.0552(8) 0.0620(8) -0.0164(7) 0.0002(6) 0.0019(6)  
 O1 0.0752(8) 0.0998(10) 0.0866(9) -0.0181(8) 0.0298(7) 0.0023(7)  
 C3 0.0526(7) 0.0508(7) 0.0498(7) -0.0036(6) 0.0079(6) -0.0029(6)  
 C1 0.0605(8) 0.0560(8) 0.0485(7) -0.0030(6) 0.0109(6) 0.0013(7)  
 C10 0.0604(8) 0.0466(7) 0.0523(8) -0.0023(6) 0.0078(6) 0.0014(6)  
 C4 0.0605(8) 0.0469(7) 0.0502(7) -0.0003(6) 0.0142(6) -0.0024(6)  
 C22 0.0608(8) 0.0482(7) 0.0655(9) -0.0120(7) -0.0109(7) 0.0038(6)  
 C15 0.0610(9) 0.0706(10) 0.0768(11) 0.0103(8) 0.0079(8) 0.0062(8)  
 C11 0.0639(8) 0.0543(8) 0.0589(8) -0.0010(7) 0.0081(7) -0.0029(7)  
 C21 0.0651(9) 0.0551(9) 0.0924(12) -0.0199(9) -0.0138(9) 0.0084(7)  
 C9 0.0825(10) 0.0569(8) 0.0530(8) -0.0022(7) 0.0097(7) 0.0032(8)  
 C23 0.0660(9) 0.0585(9) 0.0681(10) -0.0015(7) -0.0035(7) 0.0026(7)  
 C5 0.0601(8) 0.0630(9) 0.0637(9) 0.0020(7) 0.0155(7) -0.0009(7)  
 C18 0.0593(9) 0.0699(10) 0.0745(11) -0.0236(9) 0.0096(8) -0.0023(8)  
 C19 0.0555(9) 0.0852(13) 0.1106(15) -0.0393(12) 0.0121(9) 0.0046(9)  
 C12 0.0889(12) 0.0572(9) 0.0685(10) 0.0065(8) 0.0218(9) -0.0007(8)  
 C24 0.0923(13) 0.0647(10) 0.0783(12) 0.0072(9) -0.0030(9) -0.0041(9)  
 C6 0.0695(10) 0.0718(11) 0.0939(13) 0.0040(10) 0.0336(9) 0.0055(9)  
 C26 0.0987(14) 0.0504(9) 0.1024(15) -0.0017(10) -0.0303(12) 0.0151(10)  
 C20 0.0681(11) 0.0683(11) 0.1151(16) -0.0255(11) -0.0140(11) 0.0157(9)  
 C14 0.0762(11) 0.0820(12) 0.0823(12) 0.0140(10) -0.0005(9) 0.0182(10)  
 C7 0.1084(15) 0.0697(11) 0.0831(13) -0.0058(10) 0.0494(12) 0.0035(11)  
 C8 0.1217(17) 0.0672(10) 0.0546(9) -0.0054(8) 0.0256(10) 0.0003(11)  
 C13 0.1053(14) 0.0641(10) 0.0681(10) 0.0157(8) 0.0122(10) 0.0199(10)  
 C25 0.1108(17) 0.0616(11) 0.0924(14) 0.0088(10) -0.0129(13) 0.0048(11)

\_geom\_special\_details

;

All esds (except the esd in the dihedral angle between two l.s. planes) are estimated using the fullCovariance matrix. TheCell esds are taken into account individually in the estimation of esds in distances, angles and torsion angles;Correlations between esds inCell parameters are only used when they are defined byCrystal symmetry. An approximate (isotropic) treatment ofCell esds is used for estimating esds involving l.s. planes.

;

loop\_

\_geom\_bond\_atom\_site\_label\_1

\_geom\_bond\_atom\_site\_label\_2

\_geom\_bond\_distance

\_geom\_bond\_site\_symmetry\_2

\_geom\_bond\_publ\_flag

N1C2 1.3280(18) . ?

N1C1 1.3412(18) . ?

C2C3 1.4204(19) . ?

C2C4 1.4854(19) . ?

N2N3 1.3289(17) . ?

N2C1 1.3378(19) . ?

N3C3 1.3367(17) . ?

N5C16 1.2858(19) . ?

N5N4 1.3633(18) . ?

N4C1 1.3568(19) . ?

N4H2 0.9681 . ?

C16C17 1.451(2) . ?

C16H16 0.9300 . ?

C17C18 1.390(2) . ?

C17C22 1.443(2) . ?

O1C18 1.355(2) . ?

O1H1 1.0301 . ?

C3C10 1.486(2) . ?

C10C11 1.381(2) . ?

C10C15 1.385(2) . ?

C4C5 1.388(2) . ?

C4C9 1.391(2) . ?

C22C23 1.411(2) . ?

C22C21 1.424(2) . ?

C15C14 1.382(2) . ?

C15H15 0.9300 . ?

C11C12 1.382(2) . ?

C11H11 0.9300 . ?

C21C20 1.399(3) . ?

C21C26 1.424(3) . ?

C9C8 1.385(2) . ?

C9H9 0.9300 . ?

C23C24 1.376(2) . ?

C23H23 0.9300 . ?

C5C6 1.380(2) . ?  
C5H5 0.9300 . ?  
C18C19 1.419(3) . ?  
C19C20 1.354(3) . ?  
C19H19 0.9300 . ?  
C12C13 1.372(3) . ?  
C12H12 0.9300 . ?  
C24C25 1.388(3) . ?  
C24H24 0.9300 . ?  
C6C7 1.370(3) . ?  
C6H6 0.9300 . ?  
C26C25 1.345(3) . ?  
C26H26 0.9300 . ?  
C20H20 0.9300 . ?  
C14C13 1.368(3) . ?  
C14H14 0.9300 . ?  
C7C8 1.375(3) . ?  
C7H7 0.9300 . ?  
C8H8 0.9300 . ?  
C13H13 0.9300 . ?  
C25H25 0.9300 . ?

loop\_

\_geom\_angle\_atom\_site\_label\_1  
\_geom\_angle\_atom\_site\_label\_2  
\_geom\_angle\_atom\_site\_label\_3  
\_geom\_angle  
\_geom\_angle\_site\_symmetry\_1  
\_geom\_angle\_site\_symmetry\_3  
\_geom\_angle\_publ\_flag  
C2N1C1 116.19(12) . . ?  
N1C2C3 120.04(12) . . ?  
N1C2C4 114.59(12) . . ?  
C3C2C4 125.33(12) . . ?  
N3N2C1 118.10(12) . . ?  
N2N3C3 120.21(12) . . ?  
C16N5N4 118.05(13) . . ?  
C1N4N5 119.47(12) . . ?  
C1N4H2 114.8 . . ?  
N5N4H2 124.8 . . ?  
N5C16C17 120.44(14) . . ?  
N5C16H16 119.8 . . ?

C17C16H16 119.8 .. ?  
C18C17C22 118.78(15) .. ?  
C18C17C16 120.53(16) .. ?  
C22C17C16 120.68(14) .. ?  
C18 O1H1 107.7 .. ?  
N3C3C2 119.45(13) .. ?  
N3C3C10 115.01(13) .. ?  
C2C3C10 125.54(12) .. ?  
N2C1N1 125.47(13) .. ?  
N2C1N4 115.22(13) .. ?  
N1C1N4 119.27(13) .. ?  
C11C10C15 118.84(14) .. ?  
C11C10C3 121.11(13) .. ?  
C15C10C3 120.01(14) .. ?  
C5C4C9 119.38(14) .. ?  
C5C4C2 118.69(13) .. ?  
C9C4C2 121.80(14) .. ?  
C23C22C21 116.93(16) .. ?  
C23C22C17 123.64(14) .. ?  
C21C22C17 119.42(16) .. ?  
C14C15C10 120.16(16) .. ?  
C14C15H15 119.9 .. ?  
C10C15H15 119.9 .. ?  
C10C11C12 120.50(16) .. ?  
C10C11H11 119.8 .. ?  
C12C11H11 119.8 .. ?  
C20C21C22 118.77(19) .. ?  
C20C21C26 122.02(18) .. ?  
C22C21C26 119.22(18) .. ?  
C8C9C4 119.49(17) .. ?  
C8C9H9 120.3 .. ?  
C4C9H9 120.3 .. ?  
C24C23C22 121.56(16) .. ?  
C24C23H23 119.2 .. ?  
C22C23H23 119.2 .. ?  
C6C5C4 120.32(16) .. ?  
C6C5H5 119.8 .. ?  
C4C5H5 119.8 .. ?  
O1C18C17 122.96(16) .. ?  
O1C18C19 116.43(16) .. ?  
C17C18C19 120.62(18) .. ?  
C20C19C18 120.09(18) .. ?

C20C19H19 120.0 .. ?  
C18C19H19 120.0 .. ?  
C13C12C11 120.25(17) .. ?  
C13C12H12 119.9 .. ?  
C11C12H12 119.9 .. ?  
C23C24C25 121.0(2) .. ?  
C23C24H24 119.5 .. ?  
C25C24H24 119.5 .. ?  
C7C6C5 120.06(18) .. ?  
C7C6H6 120.0 .. ?  
C5C6H6 120.0 .. ?  
C25C26C21 121.79(18) .. ?  
C25C26H26 119.1 .. ?  
C21C26H26 119.1 .. ?  
C19C20C21 122.26(17) .. ?  
C19C20H20 118.9 .. ?  
C21C20H20 118.9 .. ?  
C13C14C15 120.53(18) .. ?  
C13C14H14 119.7 .. ?  
C15C14H14 119.7 .. ?  
C6C7C8 120.20(16) .. ?  
C6C7H7 119.9 .. ?  
C8C7H7 119.9 .. ?  
C7C8C9 120.49(18) .. ?  
C7C8H8 119.8 .. ?  
C9C8H8 119.8 .. ?  
C14C13C12 119.72(16) .. ?  
C14C13H13 120.1 .. ?  
C12C13H13 120.1 .. ?  
C26C25C24 119.4(2) .. ?  
C26C25H25 120.3 .. ?  
C24C25H25 120.3 .. ?

loop\_

  \_geom\_torsion\_atom\_site\_label\_1  
  \_geom\_torsion\_atom\_site\_label\_2  
  \_geom\_torsion\_atom\_site\_label\_3  
  \_geom\_torsion\_atom\_site\_label\_4  
  \_geom\_torsion  
  \_geom\_torsion\_site\_symmetry\_1  
  \_geom\_torsion\_site\_symmetry\_2  
  \_geom\_torsion\_site\_symmetry\_3

\_geom\_torsion\_site\_symmetry\_4  
\_geom\_torsion\_publ\_flag  
C1N1C2C3 -4.29(19) . . . . ?  
C1N1C2C4 173.48(12) . . . . ?  
C1N2N3C3 -3.3(2) . . . . ?  
C16N5N4C1 171.46(14) . . . . ?  
N4N5C16C17 178.17(13) . . . . ?  
N5C16C17C18 -6.9(2) . . . . ?  
N5C16C17C22 173.35(13) . . . . ?  
N2N3C3C2 -3.2(2) . . . . ?  
N2N3C3C10 176.88(12) . . . . ?  
N1C2C3N3 7.2(2) . . . . ?  
C4C2C3N3 -170.28(13) . . . . ?  
N1C2C3C10 -172.86(13) . . . . ?  
C4C2C3C10 9.6(2) . . . . ?  
N3N2C1N1 6.6(2) . . . . ?  
N3N2C1N4 -175.59(13) . . . . ?  
C2N1C1N2 -2.6(2) . . . . ?  
C2N1C1N4 179.68(13) . . . . ?  
N5N4C1N2 -176.42(14) . . . . ?  
N5N4C1N1 1.5(2) . . . . ?  
N3C3C10C11 -135.86(15) . . . . ?  
C2C3C10C11 44.2(2) . . . . ?  
N3C3C10C15 41.9(2) . . . . ?  
C2C3C10C15 -137.96(16) . . . . ?  
N1C2C4C5 35.75(19) . . . . ?  
C3C2C4C5 -146.61(14) . . . . ?  
N1C2C4C9 -140.12(14) . . . . ?  
C3C2C4C9 37.5(2) . . . . ?  
C18C17C22C23 176.02(14) . . . . ?  
C16C17C22C23 -4.3(2) . . . . ?  
C18C17C22C21 -3.1(2) . . . . ?  
C16C17C22C21 176.66(13) . . . . ?  
C11C10C15C14 -0.4(3) . . . . ?  
C3C10C15C14 -178.31(16) . . . . ?  
C15C10C11C12 0.0(2) . . . . ?  
C3C10C11C12 177.79(14) . . . . ?  
C23C22C21C20 -177.48(15) . . . . ?  
C17C22C21C20 1.7(2) . . . . ?  
C23C22C21C26 2.4(2) . . . . ?  
C17C22C21C26 -178.44(14) . . . . ?  
C5C4C9C8 1.0(2) . . . . ?



C2C4C9C8 176.88(15) . . . . ?  
 C21C22C23C24 -0.8(2) . . . . ?  
 C17C22C23C24 -179.87(15) . . . . ?  
 C9C4C5C6 -2.2(2) . . . . ?  
 C2C4C5C6 -178.14(14) . . . . ?  
 C22C17C18 O1 -177.32(14) . . . . ?  
 C16C17C18 O1 3.0(2) . . . . ?  
 C22C17C18C19 2.7(2) . . . . ?  
 C16C17C18C19 -177.00(15) . . . . ?  
 O1C18C19C20 179.07(16) . . . . ?  
 C17C18C19C20 -1.0(3) . . . . ?  
 C10C11C12C13 0.4(3) . . . . ?  
 C22C23C24C25 -1.0(3) . . . . ?  
 C4C5C6C7 1.0(3) . . . . ?  
 C20C21C26C25 177.43(18) . . . . ?  
 C22C21C26C25 -2.5(3) . . . . ?  
 C18C19C20C21 -0.5(3) . . . . ?  
 C22C21C20C19 0.1(3) . . . . ?  
 C26C21C20C19 -179.77(17) . . . . ?  
 C10C15C14C13 0.6(3) . . . . ?  
 C5C6C7C8 1.4(3) . . . . ?  
 C6C7C8C9 -2.5(3) . . . . ?  
 C4C9C8C7 1.3(3) . . . . ?  
 C15C14C13C12 -0.2(3) . . . . ?  
 C11C12C13C14 -0.3(3) . . . . ?  
 C21C26C25C24 0.7(3) . . . . ?  
 C23C24C25C26 1.0(3) . . . . ?

\_diffn\_measured\_fraction\_theta\_max 0.992  
 \_diffn\_reflns\_theta\_full 66.50  
 \_diffn\_measured\_fraction\_theta\_full 0.998  
 \_refine\_diff\_density\_max 0.188  
 \_refine\_diff\_density\_min -0.206  
 \_refine\_diff\_density\_rms 0.033

### Molecule 2Cif

data\_c:\nadeem

\_audit\_creation\_method SHELXL-97  
 \_chemical\_name\_systematic

;

<i>N</i>-((5,6-Diphenyl-[1,2,4]triazin-3-yl)-<i>N</i>-)-(4-methoxy-benzylidene)-

hydrazine

;

\_chemical\_name\_common

;

<i>N</i>-(5,6-Diphenyl-[1,2,4]triazin-3-yl)-<i>N</i>-(4-methoxy-benzylidene)-

hydrazine

;

\_chemical\_melting\_point ?

\_chemical\_formula\_moiety 'C23H19N5 O'

\_chemical\_formula\_sum

'C23H19N5 O'

\_chemical\_formula\_weight 381.43

loop\_

\_atom\_type\_symbol

\_atom\_type\_description

\_atom\_type\_scatter\_dispersion\_real

\_atom\_type\_scatter\_dispersion\_imag

\_atom\_type\_scatter\_source

'C' 'C' 0.0181 0.0091

'International Tables VolC Tables 4.2.6.8 and 6.1.1.4'

'H' 'H' 0.0000 0.0000

'International Tables VolC Tables 4.2.6.8 and 6.1.1.4'

'N' 'N' 0.0311 0.0180

'International Tables VolC Tables 4.2.6.8 and 6.1.1.4'

'O' 'O' 0.0492 0.0322

'International Tables VolC Tables 4.2.6.8 and 6.1.1.4'

\_symmetry\_cell\_setting 'Monoclinic'

\_symmetry\_space\_group\_name\_H-M 'P21/c'

\_symmetry\_space\_group\_name\_Hall '-P2ybc'

loop\_

\_symmetry\_equiv\_pos\_as\_xyz

'x, y, z'

'-x, y+1/2, -z+1/2'

'-x, -y, -z'

'x, -y-1/2, z-1/2'

\_cell\_length\_a 5.9756(18)

\_cell\_length\_b 21.573(6)

\_cell\_length\_c 14.980(4)

```

_cell_angle_alpha      90.00
_cell_angle_beta      93.45(2)
_cell_angle_gamma     90.00
_cell_volume          1927.7(9)
_cell_formula_units_Z  4
_cell_measurement_temperature 296(2)
_cell_measurement_reflns_used 1176
_cell_measurement_theta_min 2.8334
_cell_measurement_theta_max 29.2995

```

```

_exptl_crystal_description 'needle'
_exptl_crystal_colour      'Yellow'
_exptl_crystal_size_max    0.48
_exptl_crystal_size_mid    0.08
_exptl_crystal_size_min    0.05
_exptl_crystal_density_meas ?
_exptl_crystal_density_diffn 1.314
_exptl_crystal_density_method 'not measured'
_exptl_crystal_F_000      800
_exptl_absorpt_coefficient_mu 0.084
_exptl_absorpt_correction_T_min 0.71210
_exptl_absorpt_correction_T_max 1.00000
_exptl_absorpt_correction_type 'multi-scan'
_exptl_absorpt_process_details

```

```

;
CrysAlisPro, Agilent Technologies,
Version 1.171.36.20 (release 27-06-2012CrysAlis171 .NET)
(compiled Jul 11 2012,15:38:31)

```

```

Empirical absorptionCorrection using sphericalHarmonics,
implemented in SCALE3 ABSPACK scaling algorithm.

```

```

;

```

```

_exptl_special_details ?

_diffn_ambient_temperature 296(2)
_diffn_radiation_wavelength 0.71073
_diffn_radiation_type      MoK\alpha
_diffn_radiation_source    'fine-focus sealed tube'
_diffn_radiation_monochromator graphite
_diffn_measurement_device_type 'SuperNova, Dual,Cu at zero, Atlas,CCD'
_diffn_measurement_method  '\w scans'
_diffn_detector_area_resol_mean ?

```

```

_diffn_standards_number      0
_diffn_standards_interval_count .
_diffn_standards_interval_time .
_diffn_standards_decay_%     ?
_diffn_reflns_number         11554
_diffn_reflns_av_R_equivalents 0.0727
_diffn_reflns_av_sigmaI/netI  0.1262
_diffn_reflns_limit_h_min    -7
_diffn_reflns_limit_h_max     8
_diffn_reflns_limit_k_min    -27
_diffn_reflns_limit_k_max     24
_diffn_reflns_limit_l_min    -20
_diffn_reflns_limit_l_max     18
_diffn_reflns_theta_min      2.88
_diffn_reflns_theta_max      29.33
_reflns_number_total          4608
_reflns_number_gt             1775
_reflns_threshold_expression   >2sigma(I)

_computing_data_collection    'CrysAlis PRO (Agilent, 2012)'
_computing_cell_refinement    'CrysAlis PRO (Agilent, 2012)'
_computing_data_reduction     'CrysAlis PRO (Agilent, 2012)'
_computing_structure_solution 'SHELXS-97 (Sheldrick, 1990)'
_computing_structure_refinement 'SHELXL-97 (Sheldrick, 1997)'
_computing_molecular_graphics ?
_computing_publication_material ?

_iucr_refine_instructions_details
;
TITL 14097 in P2(1)/c
CELL 0.71073 5.9756 21.5731 14.9805 90.000 93.447 90.000
ZERR 4.0000 0.0018 0.0056 0.0040 0.000 0.022 0.000
LATT 1
SYMM -X, 0.5+Y, 0.5-Z
SFACCHN O
UNIT 92 76 20 4
MERG 2
FMAP 2
GRID
PLAN 20
TEMP 23
SIZE 0.05 0.08 0.48

```

BOND \$H

HTAB

CONF

L.S. 20

ACTA 52

WGHT 0.02180 0.00000 0.00000 0.00000 0.00000 0.33330

FVAR 1.69020

O1 4 1.60874 0.41310 0.94281 11.00000 0.07147 0.08726 =  
0.08046 0.00578 -0.02662 -0.00019

N1 3 0.40402 0.35009 0.58890 11.00000 0.04992 0.04967 =  
0.05303 0.00216 -0.00043 -0.00648

N2 3 0.30440 0.43955 0.50047 11.00000 0.05052 0.04896 =  
0.06466 0.00143 -0.00525 -0.00137

N3 3 0.12818 0.40936 0.46126 11.00000 0.04805 0.05515 =  
0.05971 0.00165 -0.00407 0.00092

N4 3 0.62325 0.44122 0.58888 11.00000 0.05869 0.05261 =  
0.06208 0.00461 -0.01612 -0.00987

AFIX 43

H4 2 0.64324 0.47722 0.56601 11.00000 -1.20000

AFIX 0

N5 3 0.77881 0.41939 0.65359 11.00000 0.05624 0.05530 =  
0.05242 -0.00253 -0.00885 0.00159

C1 1 0.43856 0.40747 0.56000 11.00000 0.04820 0.05064 =  
0.04908 -0.00425 0.00275 -0.00286

C2 1 0.22268 0.32186 0.55276 11.00000 0.04271 0.04990 =  
0.04181 -0.00298 0.00426 -0.00114

C3 1 0.08431 0.35113 0.48454 11.00000 0.04319 0.04251 =  
0.04982 -0.00051 0.00565 0.00340

C4 1 0.17969 0.25920 0.58764 11.00000 0.04459 0.04857 =  
0.04099 0.00430 -0.00508 -0.00432

C5 1 0.33970 0.21325 0.58139 11.00000 0.04747 0.05908 =  
0.05816 0.00481 -0.00035 -0.00207

AFIX 43

H5 2 0.47327 0.22209 0.55521 11.00000 -1.20000

AFIX 0

C6 1 0.30303 0.15481 0.61346 11.00000 0.06740 0.05151 =  
0.07096 0.00513 -0.00564 0.00425

AFIX 43

H6 2 0.40982 0.12399 0.60725 11.00000 -1.20000

AFIX 0

C7 1 0.10916 0.14150 0.65477 11.00000 0.08041 0.05691 =  
0.06422 0.01512 -0.00507 -0.01296

AFIX 43

H7 2 0.08485 0.10188 0.67668 11.00000 -1.20000

AFIX 0

C8 1 -0.04866 0.18733 0.66341 11.00000 0.06669 0.07522 =  
0.06261 0.01322 0.00984 -0.01721

AFIX 43

H8 2 -0.17815 0.17881 0.69264 11.00000 -1.20000

AFIX 0

C9 1 -0.01625 0.24557 0.62917 11.00000 0.05326 0.06124 =  
0.06158 0.00459 0.00509 -0.00351

AFIX 43

H9 2 -0.12560 0.27588 0.63380 11.00000 -1.20000

AFIX 0

C10 1 -0.10908 0.32283 0.43189 11.00000 0.04671 0.05251 =  
0.04420 0.00027 0.00045 0.00023

C11 1 -0.12049 0.26099 0.40957 11.00000 0.05002 0.06235 =  
0.05891 0.00293 -0.00613 -0.00107

AFIX 43

H11 2 -0.00533 0.23465 0.43001 11.00000 -1.20000

AFIX 0

C12 1 -0.29937 0.23697 0.35738 11.00000 0.06126 0.06120 =  
0.07264 -0.00545 -0.00166 -0.00994

AFIX 43

H12 2 -0.30288 0.19512 0.34249 11.00000 -1.20000

AFIX 0

C13 1 -0.47277 0.27576 0.32758 11.00000 0.05370 0.08541 =  
0.05614 0.00288 -0.00703 -0.01153

AFIX 43

H13 2 -0.59508 0.25983 0.29373 11.00000 -1.20000

AFIX 0

C14 1 -0.46381 0.33783 0.34811 11.00000 0.05198 0.07977 =  
0.05177 0.00622 -0.00326 0.00377

AFIX 43

H14 2 -0.57878 0.36412 0.32732 11.00000 -1.20000

AFIX 0

C15 1 -0.28347 0.36109 0.39974 11.00000 0.05158 0.06109 =  
0.04589 0.00039 0.00136 0.00749

AFIX 43

H15 2 -0.27852 0.40316 0.41328 11.00000 -1.20000

AFIX 0

C16 1 0.93780 0.45812 0.67206 11.00000 0.05638 0.05521 =  
0.05547 -0.00234 -0.00732 -0.00541

```

AFIX 43
H16  2  0.94002  0.49535  0.64084  11.00000  -1.20000
AFIX 0
C17  1  1.11498  0.44529  0.74065  11.00000  0.05349  0.04754 =
      0.04661 -0.00213 -0.00032 -0.00167
C18  1  1.12508  0.39093  0.79028  11.00000  0.05679  0.05639 =
      0.06396 -0.00294 -0.00697 -0.00507
AFIX 43
H18  2  1.01849  0.36013  0.77846  11.00000  -1.20000
AFIX 0
C19  1  1.29145  0.38206  0.85696  11.00000  0.06806  0.05696 =
      0.06783  0.00846 -0.00691 -0.00011
AFIX 43
H19  2  1.29513  0.34567  0.89031  11.00000  -1.20000
AFIX 0
C20  1  1.45299  0.42720  0.87435  11.00000  0.05667  0.06206 =
      0.05572 -0.00543 -0.01090  0.00618
C21  1  1.44882  0.48071  0.82603  11.00000  0.06194  0.05952 =
      0.06587 -0.00923 -0.01070 -0.00939
AFIX 43
H21  2  1.55791  0.51094  0.83713  11.00000  -1.20000
AFIX 0
C22  1  1.27842  0.48933  0.75977  11.00000  0.06931  0.04814 =
      0.06232  0.00361 -0.00772 -0.00766
AFIX 43
H22  2  1.27448  0.52606  0.72722  11.00000  -1.20000
AFIX 0
C23  1  1.78566  0.45639  0.96182  11.00000  0.06311  0.10751 =
      0.08569 -0.02149 -0.01883 -0.00220
AFIX 137
H23A  2  1.87234  0.46079  0.91027  11.00000  -1.50000
H23B  2  1.88034  0.44169  1.01138  11.00000  -1.50000
H23C  2  1.72336  0.49584  0.97659  11.00000  -1.50000
HKLF 4

```

```
;
```

```
_refine_special_details
```

```
;
```

Refinement of  $F^2$  against ALL reflections. The weighted R-factor  $wR$  and goodness of fit  $S$  are based on  $F^2$ , Conventional R-factors  $R$  are based on  $F$ , with  $F$  set to zero for Negative  $F^2$ . The threshold expression of  $F^2 > 2\sigma(F^2)$  is used only for Calculating R-factors(gt) etc. and is Not relevant to the Choice of reflections for refinement. R-factors based

on  $F^2$  are statistically about twice as large as those based on  $F$ , and  $R$ -factors based on ALL data will be even larger.

;

```

_refine_ls_structure_factor_coef Fsqd
_refine_ls_matrix_type full
_refine_ls_weighting_scheme Calc
_refine_ls_weighting_details
'calc w=1/[s^2^(Fo^2^)+(0.0239P)^2^+0.0000P] where P=(Fo^2^+2Fc^2^)/3'
_refine_ls_solution_primary direct
_refine_ls_solution_secondary difmap
_refine_ls_solution_hydrogens geom
_refine_ls_hydrogen_treatment mixed
_refine_ls_extinction_method None
_refine_ls_extinction_coef ?
_refine_ls_number_reflns 4608
_refine_ls_number_parameters 267
_refine_ls_number_restraints 1
_refine_ls_R_factor_all 0.1988
_refine_ls_R_factor_gt 0.0627
_refine_ls_wR_factor_ref 0.1409
_refine_ls_wR_factor_gt 0.0956
_refine_ls_goodness_of_fit_ref 1.008
_refine_ls_restrained_S_all 1.008
_refine_ls_shift/su_max 0.000
_refine_ls_shift/su_mean 0.000

```

loop\_

```

_atom_site_label
_atom_site_type_symbol
_atom_site_fract_x
_atom_site_fract_y
_atom_site_fract_z
_atom_site_U_iso_or_equiv
_atom_site_adp_type
_atom_site_occupancy
_atom_site_symmetry_multiplicity
_atom_site_calc_flag
_atom_site_refinement_flags
_atom_site_disorder_assembly
_atom_site_disorder_group

```

O1 O 1.6087(3) 0.41311(11) 0.94280(13) 0.0811(7) Uani 1 1 d . . .



N1N 0.4040(4) 0.35010(11) 0.58890(14) 0.0511(6) Uani 1 1 d . . .  
N2N 0.3044(4) 0.43953(11) 0.50049(15) 0.0552(7) Uani 1 1 d . . .  
N3N 0.1282(4) 0.40935(12) 0.46127(14) 0.0547(7) Uani 1 1 d . . .  
N4N 0.6232(4) 0.44132(13) 0.58885(16) 0.0583(7) Uani 1 1 d D . .  
N5N 0.7788(4) 0.41939(11) 0.65357(14) 0.0552(7) Uani 1 1 d . . .  
C1C 0.4387(4) 0.40749(14) 0.56001(17) 0.0494(8) Uani 1 1 d . . .  
C2C 0.2227(4) 0.32186(13) 0.55276(16) 0.0448(7) Uani 1 1 d . . .  
C3C 0.0843(4) 0.35112(13) 0.48455(17) 0.0452(7) Uani 1 1 d . . .  
C4C 0.1797(4) 0.25920(13) 0.58764(16) 0.0451(7) Uani 1 1 d . . .  
C5C 0.3397(5) 0.21324(15) 0.58139(18) 0.0551(8) Uani 1 1 d . . .  
H5H 0.4733 0.2221 0.5552 0.066 Uiso 1 1Calc R . .  
C6C 0.3030(5) 0.15481(15) 0.6135(2) 0.0638(9) Uani 1 1 d . . .  
H6H 0.4098 0.1240 0.6073 0.077 Uiso 1 1Calc R . .  
C7C 0.1092(6) 0.14150(16) 0.6548(2) 0.0676(10) Uani 1 1 d . . .  
H7H 0.0849 0.1019 0.6767 0.081 Uiso 1 1Calc R . .  
C8C -0.0486(5) 0.18732(17) 0.66341(19) 0.0680(9) Uani 1 1 d . . .  
H8H -0.1781 0.1788 0.6926 0.082 Uiso 1 1Calc R . .  
C9C -0.0163(5) 0.24557(15) 0.62916(18) 0.0588(8) Uani 1 1 d . . .  
H9H -0.1256 0.2759 0.6338 0.071 Uiso 1 1Calc R . .  
C10C -0.1091(4) 0.32283(14) 0.43189(16) 0.0480(7) Uani 1 1 d . . .  
C11C -0.1205(5) 0.26100(15) 0.40956(18) 0.0576(8) Uani 1 1 d . . .  
H11H -0.0053 0.2347 0.4300 0.069 Uiso 1 1Calc R . .  
C12C -0.2993(5) 0.23698(15) 0.35737(19) 0.0654(9) Uani 1 1 d . . .  
H12H -0.3028 0.1951 0.3425 0.078 Uiso 1 1Calc R . .  
C13C -0.4728(5) 0.27577(17) 0.32758(19) 0.0656(9) Uani 1 1 d . . .  
H13H -0.5951 0.2598 0.2937 0.079 Uiso 1 1Calc R . .  
C14C -0.4638(5) 0.33782(16) 0.34811(18) 0.0615(9) Uani 1 1 d . . .  
H14H -0.5788 0.3641 0.3273 0.074 Uiso 1 1Calc R . .  
C15C -0.2835(4) 0.36109(14) 0.39973(16) 0.0531(8) Uani 1 1 d . . .  
H15H -0.2785 0.4032 0.4133 0.064 Uiso 1 1Calc R . .  
C16C 0.9378(5) 0.45811(14) 0.67206(17) 0.0562(8) Uani 1 1 d . . .  
H16H 0.9400 0.4954 0.6409 0.067 Uiso 1 1Calc R . .  
C17C 1.1149(4) 0.44529(14) 0.74066(17) 0.0495(8) Uani 1 1 d . . .  
C18C 1.1251(5) 0.39092(14) 0.79030(18) 0.0596(9) Uani 1 1 d . . .  
H18H 1.0185 0.3601 0.7785 0.072 Uiso 1 1Calc R . .  
C19C 1.2915(5) 0.38205(15) 0.85695(19) 0.0648(9) Uani 1 1 d . . .  
H19H 1.2951 0.3457 0.8903 0.078 Uiso 1 1Calc R . .  
C20C 1.4530(5) 0.42719(15) 0.87436(19) 0.0588(9) Uani 1 1 d . . .  
C21C 1.4488(5) 0.48071(15) 0.82602(19) 0.0631(9) Uani 1 1 d . . .  
H21H 1.5579 0.5109 0.8371 0.076 Uiso 1 1Calc R . .  
C22C 1.2784(5) 0.48934(14) 0.75977(18) 0.0605(9) Uani 1 1 d . . .  
H22H 1.2745 0.5261 0.7272 0.073 Uiso 1 1Calc R . .

C23C 1.7857(5) 0.45639(17) 0.9618(2) 0.0864(12) Uani 1 1 d . . .  
H23AH 1.8724 0.4608 0.9103 0.130 Uiso 1 1 Calc R . .  
H23BH 1.8803 0.4417 1.0114 0.130 Uiso 1 1 Calc R . .  
H23CH 1.7234 0.4958 0.9766 0.130 Uiso 1 1 Calc R . .  
H1H 0.646(5) 0.4783(8) 0.5642(18) 0.081(12) Uiso 1 1 d D . .

loop\_

\_atom\_site\_aniso\_label  
\_atom\_site\_aniso\_U\_11  
\_atom\_site\_aniso\_U\_22  
\_atom\_site\_aniso\_U\_33  
\_atom\_site\_aniso\_U\_23  
\_atom\_site\_aniso\_U\_13  
\_atom\_site\_aniso\_U\_12

O1 0.0716(14) 0.0875(18) 0.0805(14) 0.0059(13) -0.0267(13) -0.0003(14)  
N1 0.0500(14) 0.0498(17) 0.0531(14) 0.0022(13) -0.0004(12) -0.0064(12)  
N2 0.0508(14) 0.0490(16) 0.0647(15) 0.0015(13) -0.0052(13) -0.0014(13)  
N3 0.0482(14) 0.0552(17) 0.0598(15) 0.0016(14) -0.0041(12) 0.0009(13)  
N4 0.0579(16) 0.0533(18) 0.0613(15) 0.0042(16) -0.0160(13) -0.0099(14)  
N5 0.0564(15) 0.0552(17) 0.0527(13) -0.0026(13) -0.0087(13) 0.0014(13)  
C1 0.0485(17) 0.051(2) 0.0490(16) -0.0040(16) 0.0028(14) -0.0025(16)  
C2 0.0428(15) 0.0500(19) 0.0419(14) -0.0030(14) 0.0042(13) -0.0012(15)  
C3 0.0433(16) 0.0427(19) 0.0501(16) -0.0005(15) 0.0057(13) 0.0034(14)  
C4 0.0447(17) 0.0488(19) 0.0410(15) 0.0043(14) -0.0051(14) -0.0043(15)  
C5 0.0476(17) 0.059(2) 0.0583(18) 0.0047(17) -0.0004(14) -0.0020(17)  
C6 0.068(2) 0.052(2) 0.071(2) 0.0052(18) -0.0056(18) 0.0042(18)  
C7 0.081(2) 0.057(2) 0.064(2) 0.0151(18) -0.0050(19) -0.013(2)  
C8 0.067(2) 0.075(3) 0.0627(19) 0.013(2) 0.0099(17) -0.017(2)  
C9 0.0534(19) 0.061(2) 0.0617(18) 0.0046(17) 0.0052(16) -0.0035(17)  
C10 0.0469(16) 0.052(2) 0.0443(15) 0.0003(15) 0.0005(13) 0.0002(15)  
C11 0.0501(18) 0.063(2) 0.0590(18) 0.0030(17) -0.0062(15) -0.0010(16)  
C12 0.061(2) 0.061(2) 0.073(2) -0.0055(18) -0.0017(18) -0.0099(18)  
C13 0.0538(19) 0.086(3) 0.0563(18) 0.003(2) -0.0070(16) -0.0115(19)  
C14 0.0521(19) 0.080(3) 0.0519(18) 0.0062(18) -0.0032(15) 0.0037(18)  
C15 0.0516(17) 0.061(2) 0.0460(15) 0.0004(16) 0.0014(14) 0.0075(16)  
C16 0.0565(18) 0.055(2) 0.0555(17) -0.0023(16) -0.0072(15) -0.0053(16)  
C17 0.0536(17) 0.048(2) 0.0467(15) -0.0022(15) -0.0003(14) -0.0017(15)  
C18 0.0570(19) 0.056(2) 0.0641(18) -0.0030(17) -0.0070(16) -0.0051(16)  
C19 0.068(2) 0.057(2) 0.068(2) 0.0084(17) -0.0069(17) -0.0002(18)  
C20 0.0568(19) 0.062(2) 0.0558(17) -0.0054(17) -0.0109(16) 0.0062(17)  
C21 0.062(2) 0.060(2) 0.0659(19) -0.0093(18) -0.0106(17) -0.0094(17)  
C22 0.069(2) 0.048(2) 0.0624(19) 0.0035(16) -0.0078(17) -0.0076(17)

C23 0.063(2) 0.107(3) 0.086(2) -0.021(2) -0.0188(19) -0.002(2)

\_geom\_special\_details

;

All esds (except the esd in the dihedral angle between two l.s. planes) are estimated using the fullCovariance matrix. TheCell esds are taken into account individually in the estimation of esds in distances, angles and torsion angles;Correlations between esds inCell parameters are only used when they are defined byCrystal symmetry. An approximate (isotropic) treatment ofCell esds is used for estimating esds involving l.s. planes.

;

loop\_

\_geom\_bond\_atom\_site\_label\_1

\_geom\_bond\_atom\_site\_label\_2

\_geom\_bond\_distance

\_geom\_bond\_site\_symmetry\_2

\_geom\_bond\_publ\_flag

O1C20 1.377(3) . ?

O1C23 1.426(3) . ?

N1C2 1.330(3) . ?

N1C1 1.332(3) . ?

N2N3 1.343(3) . ?

N2C1 1.353(3) . ?

N3C3 1.334(3) . ?

N4C1 1.371(3) . ?

N4N5 1.385(3) . ?

N4H1 0.894(10) . ?

N5C16 1.283(3) . ?

C2C3 1.423(3) . ?

C2C4 1.477(4) . ?

C3C10 1.490(3) . ?

C4C5 1.385(4) . ?

C4C9 1.390(4) . ?

C5C6 1.371(4) . ?

C5H5 0.9300 . ?

C6C7 1.376(4) . ?

C6H6 0.9300 . ?

C7C8 1.378(4) . ?

C7H7 0.9300 . ?

C8C9 1.375(4) . ?

C8H8 0.9300 . ?

C9H9 0.9300 . ?  
C10C11 1.376(4) . ?  
C10C15 1.392(3) . ?  
C11C12 1.386(3) . ?  
C11H11 0.9300 . ?  
C12C13 1.385(4) . ?  
C12H12 0.9300 . ?  
C13C14 1.374(4) . ?  
C13H13 0.9300 . ?  
C14C15 1.382(3) . ?  
C14H14 0.9300 . ?  
C15H15 0.9300 . ?  
C16C17 1.457(3) . ?  
C16H16 0.9300 . ?  
C17C22 1.380(4) . ?  
C17C18 1.388(4) . ?  
C18C19 1.379(3) . ?  
C18H18 0.9300 . ?  
C19C20 1.385(4) . ?  
C19H19 0.9300 . ?  
C20C21 1.362(4) . ?  
C21C22 1.391(3) . ?  
C21H21 0.9300 . ?  
C22H22 0.9300 . ?  
C23H23A 0.9600 . ?  
C23H23B 0.9600 . ?  
C23H23C 0.9600 . ?

loop\_

\_geom\_angle\_atom\_site\_label\_1  
\_geom\_angle\_atom\_site\_label\_2  
\_geom\_angle\_atom\_site\_label\_3  
\_geom\_angle  
\_geom\_angle\_site\_symmetry\_1  
\_geom\_angle\_site\_symmetry\_3  
\_geom\_angle\_publ\_flag  
C20 O1C23 117.7(3) . . ?  
C2N1C1 115.6(2) . . ?  
N3N2C1 117.3(2) . . ?  
C3N3N2 120.2(2) . . ?  
C1N4N5 122.2(3) . . ?  
C1N4H1 118.9(18) . . ?

N5N4H1 118.9(18) .. ?  
C16N5N4 112.7(3) .. ?  
N1C1N2 126.3(2) .. ?  
N1C1N4 122.0(2) .. ?  
N2C1N4 111.7(3) .. ?  
N1C2C3 120.9(3) .. ?  
N1C2C4 115.5(2) .. ?  
C3C2C4 123.6(2) .. ?  
N3C3C2 119.4(2) .. ?  
N3C3C10 113.9(2) .. ?  
C2C3C10 126.7(3) .. ?  
C5C4C9 118.9(3) .. ?  
C5C4C2 119.7(3) .. ?  
C9C4C2 121.4(3) .. ?  
C6C5C4 120.6(3) .. ?  
C6C5H5 119.7 .. ?  
C4C5H5 119.7 .. ?  
C5C6C7 120.4(3) .. ?  
C5C6H6 119.8 .. ?  
C7C6H6 119.8 .. ?  
C6C7C8 119.5(3) .. ?  
C6C7H7 120.3 .. ?  
C8C7H7 120.3 .. ?  
C9C8C7 120.5(3) .. ?  
C9C8H8 119.7 .. ?  
C7C8H8 119.7 .. ?  
C8C9C4 120.1(3) .. ?  
C8C9H9 120.0 .. ?  
C4C9H9 120.0 .. ?  
C11C10C15 117.7(2) .. ?  
C11C10C3 123.5(2) .. ?  
C15C10C3 118.7(3) .. ?  
C10C11C12 121.7(3) .. ?  
C10C11H11 119.2 .. ?  
C12C11H11 119.2 .. ?  
C13C12C11 119.5(3) .. ?  
C13C12H12 120.2 .. ?  
C11C12H12 120.2 .. ?  
C14C13C12 119.9(3) .. ?  
C14C13H13 120.1 .. ?  
C12C13H13 120.1 .. ?  
C13C14C15 119.8(3) .. ?

C13C14H14 120.1 .. ?  
C15C14H14 120.1 .. ?  
C14C15C10 121.4(3) .. ?  
C14C15H15 119.3 .. ?  
C10C15H15 119.3 .. ?  
N5C16C17 121.7(3) .. ?  
N5C16H16 119.1 .. ?  
C17C16H16 119.1 .. ?  
C22C17C18 117.6(2) .. ?  
C22C17C16 119.4(3) .. ?  
C18C17C16 123.0(3) .. ?  
C19C18C17 120.8(3) .. ?  
C19C18H18 119.6 .. ?  
C17C18H18 119.6 .. ?  
C18C19C20 120.2(3) .. ?  
C18C19H19 119.9 .. ?  
C20C19H19 119.9 .. ?  
C21C20 O1 125.0(3) .. ?  
C21C20C19 120.4(3) .. ?  
O1C20C19 114.7(3) .. ?  
C20C21C22 118.8(3) .. ?  
C20C21H21 120.6 .. ?  
C22C21H21 120.6 .. ?  
C17C22C21 122.3(3) .. ?  
C17C22H22 118.8 .. ?  
C21C22H22 118.8 .. ?  
O1C23H23A 109.5 .. ?  
O1C23H23B 109.5 .. ?  
H23AC23H23B 109.5 .. ?  
O1C23H23C 109.5 .. ?  
H23AC23H23C 109.5 .. ?  
H23BC23H23C 109.5 .. ?

loop\_

  \_geom\_torsion\_atom\_site\_label\_1  
  \_geom\_torsion\_atom\_site\_label\_2  
  \_geom\_torsion\_atom\_site\_label\_3  
  \_geom\_torsion\_atom\_site\_label\_4  
  \_geom\_torsion  
  \_geom\_torsion\_site\_symmetry\_1  
  \_geom\_torsion\_site\_symmetry\_2  
  \_geom\_torsion\_site\_symmetry\_3

\_geom\_torsion\_site\_symmetry\_4

\_geom\_torsion\_publ\_flag

C1N2N3C3 3.3(4) . . . . ?

C1N4N5C16 -179.3(3) . . . . ?

C2N1C1N2 2.2(4) . . . . ?

C2N1C1N4 -177.5(3) . . . . ?

N3N2C1N1 -5.5(4) . . . . ?

N3N2C1N4 174.2(2) . . . . ?

N5N4C1N1 -3.7(4) . . . . ?

N5N4C1N2 176.5(2) . . . . ?

C1N1C2C3 3.0(4) . . . . ?

C1N1C2C4 -177.6(3) . . . . ?

N2N3C3C2 1.5(4) . . . . ?

N2N3C3C10 -177.0(2) . . . . ?

N1C2C3N3 -4.9(4) . . . . ?

C4C2C3N3 175.8(3) . . . . ?

N1C2C3C10 173.3(3) . . . . ?

C4C2C3C10 -6.0(4) . . . . ?

N1C2C4C5 -58.7(3) . . . . ?

C3C2C4C5 120.6(3) . . . . ?

N1C2C4C9 119.4(3) . . . . ?

C3C2C4C9 -61.2(4) . . . . ?

C9C4C5C6 1.7(4) . . . . ?

C2C4C5C6 179.9(2) . . . . ?

C4C5C6C7 -1.9(4) . . . . ?

C5C6C7C8 0.2(4) . . . . ?

C6C7C8C9 1.6(4) . . . . ?

C7C8C9C4 -1.8(4) . . . . ?

C5C4C9C8 0.2(4) . . . . ?

C2C4C9C8 -178.0(2) . . . . ?

N3C3C10C11 146.2(3) . . . . ?

C2C3C10C11 -32.2(4) . . . . ?

N3C3C10C15 -30.7(4) . . . . ?

C2C3C10C15 150.9(3) . . . . ?

C15C10C11C12 -0.4(4) . . . . ?

C3C10C11C12 -177.3(3) . . . . ?

C10C11C12C13 -0.8(5) . . . . ?

C11C12C13C14 1.5(5) . . . . ?

C12C13C14C15 -1.1(5) . . . . ?

C13C14C15C10 -0.1(4) . . . . ?

C11C10C15C14 0.8(4) . . . . ?

C3C10C15C14 177.9(2) . . . . ?

N4N5C16C17 177.7(2) . . . . ?  
 N5C16C17C22 -178.1(3) . . . . ?  
 N5C16C17C18 0.2(4) . . . . ?  
 C22C17C18C19 0.9(5) . . . . ?  
 C16C17C18C19 -177.4(3) . . . . ?  
 C17C18C19C20 -0.9(5) . . . . ?  
 C23 O1C20C21 -3.2(4) . . . . ?  
 C23 O1C20C19 177.4(3) . . . . ?  
 C18C19C20C21 0.1(5) . . . . ?  
 C18C19C20 O1 179.5(3) . . . . ?  
 O1C20C21C22 -178.7(3) . . . . ?  
 C19C20C21C22 0.7(5) . . . . ?  
 C18C17C22C21 0.0(4) . . . . ?  
 C16C17C22C21 178.3(3) . . . . ?  
 C20C21C22C17 -0.7(5) . . . . ?

\_diffn\_measured\_fraction\_theta\_max 0.871  
 \_diffn\_reflns\_theta\_full 26.00  
 \_diffn\_measured\_fraction\_theta\_full 0.999  
 \_refine\_diff\_density\_max 0.155  
 \_refine\_diff\_density\_min -0.187  
 \_refine\_diff\_density\_rms 0.038

### Molecule 3Cif

data\_c:\nadeem

\_audit\_creation\_method SHELXL-97  
 \_chemical\_name\_systematic  
 ;  
 {4-[(5,6-Diphenyl-[1,2,4]triazin-3-yl)-hydrazonomethyl]-phenyl}-dimethyl-amine  
 ;  
 \_chemical\_name\_common  
 ;  
 {4-[(5,6-Diphenyl-[1,2,4]triazin-3-yl)-hydrazonomethyl]-phenyl}-dimethyl-amine  
 ;  
 \_chemical\_melting\_point ?  
 \_chemical\_formula\_moiety 'C24H22N6'  
 \_chemical\_formula\_sum  
 'C24H22N6'  
 \_chemical\_formula\_weight 394.48

loop\_



\_atom\_type\_symbol  
 \_atom\_type\_description  
 \_atom\_type\_scatter\_dispersion\_real  
 \_atom\_type\_scatter\_dispersion\_imag  
 \_atom\_type\_scatter\_source  
 'C' 'C' 0.0181 0.0091  
 'International Tables VolC Tables 4.2.6.8 and 6.1.1.4'  
 'H' 'H' 0.0000 0.0000  
 'International Tables VolC Tables 4.2.6.8 and 6.1.1.4'  
 'N' 'N' 0.0311 0.0180  
 'International Tables VolC Tables 4.2.6.8 and 6.1.1.4'

\_symmetry\_cell\_setting 'Triclinic'  
 \_symmetry\_space\_group\_name\_H-M 'P -1'  
 \_symmetry\_space\_group\_name\_Hall '-P 1'

loop\_

\_symmetry\_equiv\_pos\_as\_xyz

'x, y, z'

'-x, -y, -z'

\_cell\_length\_a 8.8933(10)  
 \_cell\_length\_b 11.1477(11)  
 \_cell\_length\_c 11.7484(13)  
 \_cell\_angle\_alpha 91.212(9)  
 \_cell\_angle\_beta 106.044(10)  
 \_cell\_angle\_gamma 108.519(9)  
 \_cell\_volume 1053.8(2)  
 \_cell\_formula\_units\_Z 2  
 \_cell\_measurement\_temperature 296(2)  
 \_cell\_measurement\_reflns\_used 2729  
 \_cell\_measurement\_theta\_min 2.8089  
 \_cell\_measurement\_theta\_max 29.3928

\_exptl\_crystal\_description 'prismatic'  
 \_exptl\_crystal\_colour 'red'  
 \_exptl\_crystal\_size\_max 0.32  
 \_exptl\_crystal\_size\_mid 0.26  
 \_exptl\_crystal\_size\_min 0.17  
 \_exptl\_crystal\_density\_meas ?  
 \_exptl\_crystal\_density\_diffn 1.243  
 \_exptl\_crystal\_density\_method 'not measured'

```

_exptl_crystal_F_000      416
_exptl_absorpt_coefficient_mu  0.077
_exptl_absorpt_correction_T_min      0.88996
_exptl_absorpt_correction_T_max      1.00000
_exptl_absorpt_correction_type      'multi-scan'
_exptl_absorpt_process_details
;
CrysAlisPro, Agilent Technologies,
Version 1.171.36.20 (release 27-06-2012CrysAlis171 .NET)
(compiled Jul 11 2012,15:38:31)
Empirical absorptionCorrection using sphericalHarmonics,
implemented in SCALE3 ABSPACK scaling algorithm.
;

_exptl_special_details      ?

_diffrn_ambient_temperature      296(2)
_diffrn_radiation_wavelength      0.71073
_diffrn_radiation_type      MoK\alpha
_diffrn_radiation_source      'fine-focus sealed tube'
_diffrn_radiation_monochromator      graphite
_diffrn_measurement_device_type      'SuperNova, Dual,Cu at zero, Atlas,CCD'
_diffrn_measurement_method      '\w scans'
_diffrn_detector_area_resol_mean      ?
_diffrn_standards_number      0
_diffrn_standards_interval_count      .
_diffrn_standards_interval_time      .
_diffrn_standards_decay_%      ?
_diffrn_reflns_number      9379
_diffrn_reflns_av_R_equivalents      0.0252
_diffrn_reflns_av_sigmaI/netI      0.0376
_diffrn_reflns_limit_h_min      -11
_diffrn_reflns_limit_h_max      9
_diffrn_reflns_limit_k_min      -12
_diffrn_reflns_limit_k_max      14
_diffrn_reflns_limit_l_min      -16
_diffrn_reflns_limit_l_max      15
_diffrn_reflns_theta_min      2.81
_diffrn_reflns_theta_max      29.45
_reflns_number_total      5004
_reflns_number_gt      3405
_reflns_threshold_expression      >2sigma(I)

```

```
_computing_data_collection 'CrysAlis PRO (Agilent, 2012)'  
_computing_cell_refinement 'CrysAlis PRO (Agilent, 2012)'  
_computing_data_reduction 'CrysAlis PRO (Agilent, 2012)'  
_computing_structure_solution 'SHELXS-97 (Sheldrick, 1990)'  
_computing_structure_refinement 'SHELXL-97 (Sheldrick, 1997)'  
_computing_molecular_graphics ?  
_computing_publication_material ?  
  
_iucr_refine_instructions_details  
;  
TITL 14098 in P-1  
CELL 0.71073 8.8933 11.1477 11.7484 91.212 106.044 108.519  
ZERR 2.0000 0.0010 0.0011 0.0013 0.009 0.010 0.009  
LATT 1  
SFACCHN  
UNIT 48 44 12  
MERG 2  
FMAP 2  
GRID  
PLAN 20  
TEMP 23  
SIZE 0.17 0.26 0.32  
BOND $H  
HTAB  
CONF  
L.S. 20  
ACTA  
EXTI 0.01392  
WGHT 0.04620 0.35700 0.00000 0.00000 0.00000 0.33330  
FVAR 6.11470  
N1 3 0.23539 0.20313 0.27176 11.00000 0.03926 0.04955 =  
0.03608 -0.00672 0.00955 0.01206  
N2 3 -0.00809 0.04621 0.14092 11.00000 0.04349 0.05014 =  
0.03287 -0.00682 0.01177 0.01020  
N3 3 -0.09474 0.05073 0.21620 11.00000 0.04139 0.04797 =  
0.03569 -0.00442 0.01054 0.01030  
N5 3 0.39670 0.17391 0.10685 11.00000 0.04074 0.04991 =  
0.03995 -0.00179 0.01314 0.01242  
N4 3 0.23205 0.10501 0.09231 11.00000 0.04079 0.05465 =  
0.03838 -0.00997 0.01361 0.00774  
C16 1 0.44741 0.15251 0.01888 11.00000 0.04600 0.04829 =
```

0.03846 -0.00230 0.01396 0.01278

AFIX 43

H16 2 0.37164 0.09580 -0.04639 11.00000 -1.20000

AFIX 0

C2 1 0.14505 0.21107 0.34258 11.00000 0.03809 0.04667 =  
0.03442 -0.00394 0.00779 0.01453

C3 1 -0.02206 0.13014 0.31745 11.00000 0.03967 0.04331 =  
0.03105 -0.00018 0.00855 0.01431

C17 1 0.61704 0.21217 0.01568 11.00000 0.04601 0.04384 =  
0.03697 0.00176 0.01341 0.01382

C10 1 -0.12587 0.12870 0.39699 11.00000 0.04057 0.04051 =  
0.03657 -0.00144 0.01135 0.01074

C18 1 0.66255 0.17611 -0.08029 11.00000 0.04693 0.05321 =  
0.04183 -0.00938 0.01271 0.00835

AFIX 43

H18 2 0.58232 0.11706 -0.14211 11.00000 -1.20000

AFIX 0

C1 1 0.15386 0.11962 0.17231 11.00000 0.04059 0.04192 =  
0.03392 -0.00085 0.01035 0.01365

C22 1 0.74240 0.30237 0.10573 11.00000 0.05630 0.04677 =  
0.03490 0.00149 0.01558 0.01370

AFIX 43

H22 2 0.71625 0.32991 0.17072 11.00000 -1.20000

AFIX 0

N6 3 1.10876 0.36140 -0.00191 11.00000 0.04474 0.06378 =  
0.06240 -0.00211 0.01653 0.00591

C20 1 0.94894 0.31381 0.00399 11.00000 0.04504 0.04397 =  
0.04680 0.00482 0.01239 0.01191

C15 1 -0.28761 0.12828 0.34960 11.00000 0.04376 0.05221 =  
0.04616 0.00501 0.01313 0.01377

AFIX 43

H15 2 -0.33189 0.12517 0.26759 11.00000 -1.20000

AFIX 0

C21 1 0.90269 0.35127 0.10086 11.00000 0.05147 0.04538 =  
0.03587 -0.00006 0.00625 0.00803

AFIX 43

H21 2 0.98247 0.41040 0.16282 11.00000 -1.20000

AFIX 0

C12 1 -0.16206 0.12897 0.59179 11.00000 0.07265 0.07116 =  
0.04001 0.00346 0.02346 0.02361

AFIX 43

H12 2 -0.12095 0.12682 0.67333 11.00000 -1.20000

AFIX 0

C19 1 0.82241 0.22493 -0.08681 11.00000 0.05053 0.05627 =  
 0.04823 -0.00880 0.02124 0.00968

AFIX 43

H19 2 0.84716 0.19842 -0.15291 11.00000 -1.20000

AFIX 0

C11 1 -0.06461 0.12784 0.51938 11.00000 0.05270 0.06139 =  
 0.03865 0.00041 0.01337 0.02169

AFIX 43

H11 2 0.04264 0.12651 0.55231 11.00000 -1.20000

AFIX 0

C4 1 0.22613 0.31234 0.44614 11.00000 0.03678 0.06339 =  
 0.04295 -0.01709 0.01104 0.00797

C14 1 -0.38289 0.13246 0.42355 11.00000 0.04919 0.07764 =  
 0.07051 0.01040 0.02504 0.02592

AFIX 43

H14 2 -0.48985 0.13476 0.39158 11.00000 -1.20000

AFIX 0

C7 1 0.38028 0.50445 0.63536 11.00000 0.06037 0.12292 =  
 0.09155 -0.07040 0.01549 0.00185

AFIX 43

H7 2 0.43290 0.56910 0.69886 11.00000 -1.20000

AFIX 0

C9 1 0.16233 0.40864 0.45611 11.00000 0.05965 0.05914 =  
 0.06400 -0.01718 0.01526 0.01395

AFIX 43

H9 2 0.06610 0.40881 0.39914 11.00000 -1.20000

AFIX 0

C23 1 1.14903 0.32988 -0.10714 11.00000 0.05250 0.08042 =  
 0.08300 0.00093 0.03139 0.01305

AFIX 137

H23A 2 1.12849 0.23988 -0.11804 11.00000 -1.50000

H23B 2 1.26410 0.37522 -0.09776 11.00000 -1.50000

H23C 2 1.08127 0.35360 -0.17555 11.00000 -1.50000

AFIX 0

C13 1 -0.31943 0.13322 0.54484 11.00000 0.07096 0.08269 =  
 0.06612 0.00793 0.04227 0.02843

AFIX 43

H13 2 -0.38326 0.13662 0.59478 11.00000 -1.20000

AFIX 0

C24 1 1.24198 0.44671 0.09504 11.00000 0.04708 0.06166 =  
 0.06690 0.00930 0.00395 0.00483

```

AFIX 137
H24A  2  1.21987  0.52442  0.10560  11.00000  -1.50000
H24B  2  1.34510  0.46525  0.07664  11.00000  -1.50000
H24C  2  1.24925  0.40699  0.16715  11.00000  -1.50000
AFIX 0
C8    1  0.24118  0.50521  0.55081  11.00000  0.07780  0.06850 =
      0.09326 -0.03264  0.03254  0.00996
AFIX 43
H8    2  0.19867  0.57058  0.55637  11.00000  -1.20000
AFIX 0
C6    1  0.44222  0.40916  0.62694  11.00000  0.06213  0.17406 =
      0.08734 -0.07994 -0.01848  0.04084
AFIX 43
H6    2  0.53654  0.40824  0.68561  11.00000  -1.20000
AFIX 0
C5    1  0.36685  0.31337  0.53218  11.00000  0.05765  0.13011 =
      0.07237 -0.05112 -0.01061  0.04415
AFIX 43
H5    2  0.41176  0.24941  0.52679  11.00000  -1.20000
H1    2  0.15930  0.04591  0.02181  11.00000  0.06325
HKLF 4
;
_refine_special_details
;
Refinement of F2 against ALL reflections. The weighted R-factor wR and
goodness of fit S are based on F2, Conventional R-factors R are based
on F, with F set to zero for Negative F2. The threshold expression of
F2 > 2sigma(F2) is used only for Calculating R-factors(gt) etc. and is
Not relevant to the Choice of reflections for refinement. R-factors based
on F2 are statistically about twice as large as those based on F, and R-
factors based on ALL data will be even larger.
;

_refine_ls_structure_factor_coef Fsqd
_refine_ls_matrix_type    full
_refine_ls_weighting_scheme    Calc
_refine_ls_weighting_details
'calc w=1/[s2(Fo2)+(0.0462P)2+0.3570P] where P=(Fo2+2Fc2)/3'
_atom_sites_solution_primary    direct
_atom_sites_solution_secondary  difmap
_atom_sites_solution_hydrogens  geom
_refine_ls_hydrogen_treatment  Constr

```

```

_refine_ls_extinction_method  SHELXL
_refine_ls_extinction_coef    0.014(3)
_refine_ls_extinction_expression
'Fc**^=kFc[1+0.001xFc^2^l^3^/sin(2\q)]^-1/4^'
_refine_ls_number_reflns     5004
_refine_ls_number_parameters  275
_refine_ls_number_restraints  0
_refine_ls_R_factor_all      0.0836
_refine_ls_R_factor_gt       0.0538
_refine_ls_wR_factor_ref      0.1422
_refine_ls_wR_factor_gt      0.1218
_refine_ls_goodness_of_fit_ref 1.035
_refine_ls_restrained_S_all   1.035
_refine_ls_shift/su_max       0.000
_refine_ls_shift/su_mean      0.000

```

loop\_

```

_atom_site_label
_atom_site_type_symbol
_atom_site_fract_x
_atom_site_fract_y
_atom_site_fract_z
_atom_site_U_iso_or_equiv
_atom_site_adp_type
_atom_site_occupancy
_atom_site_symmetry_multiplicity
_atom_site_calc_flag
_atom_site_refinement_flags
_atom_site_disorder_assembly
_atom_site_disorder_group
N1N 0.23539(17) 0.20313(14) 0.27176(12) 0.0429(4) Uani 1 1 d . . .
N2N -0.00808(18) 0.04621(14) 0.14092(12) 0.0436(4) Uani 1 1 d . . .
N3N -0.09474(17) 0.05074(14) 0.21620(12) 0.0432(4) Uani 1 1 d . . .
N5N 0.39670(18) 0.17391(14) 0.10685(13) 0.0441(4) Uani 1 1 d . . .
N4N 0.23205(18) 0.10501(15) 0.09231(13) 0.0465(4) Uani 1 1 d . . .
C16C 0.4474(2) 0.15251(17) 0.01887(16) 0.0448(4) Uani 1 1 d . . .
H16H 0.3716 0.0958 -0.0464 0.054 Uiso 1 1 Calc R . .
C2C 0.1450(2) 0.21106(17) 0.34257(15) 0.0404(4) Uani 1 1 d . . .
C3C -0.0221(2) 0.13015(16) 0.31745(14) 0.0384(4) Uani 1 1 d . . .
C17C 0.6170(2) 0.21217(17) 0.01568(15) 0.0424(4) Uani 1 1 d . . .
C10C -0.1259(2) 0.12870(16) 0.39699(15) 0.0401(4) Uani 1 1 d . . .
C18C 0.6626(2) 0.17612(18) -0.08029(17) 0.0498(5) Uani 1 1 d . . .

```

H18H 0.5823 0.1171 -0.1421 0.060 Uiso 1 1Calc R . .  
C1C 0.1539(2) 0.11962(16) 0.17231(15) 0.0391(4) Uani 1 1 d . . .  
C22C 0.7424(2) 0.30237(17) 0.10573(16) 0.0465(4) Uani 1 1 d . . .  
H22H 0.7163 0.3299 0.1707 0.056 Uiso 1 1Calc R . .  
N6N 1.1088(2) 0.36140(17) -0.00191(16) 0.0601(5) Uani 1 1 d . . .  
C20C 0.9489(2) 0.31381(17) 0.00399(17) 0.0463(4) Uani 1 1 d . . .  
C15C -0.2876(2) 0.12828(18) 0.34961(17) 0.0480(4) Uani 1 1 d . . .  
H15H -0.3319 0.1252 0.2676 0.058 Uiso 1 1Calc R . .  
C21C 0.9027(2) 0.35127(17) 0.10085(16) 0.0478(5) Uani 1 1 d . . .  
H21H 0.9825 0.4104 0.1628 0.057 Uiso 1 1Calc R . .  
C12C -0.1620(3) 0.1290(2) 0.59179(18) 0.0601(6) Uani 1 1 d . . .  
H12H -0.1209 0.1268 0.6733 0.072 Uiso 1 1Calc R . .  
C19C 0.8224(2) 0.22494(19) -0.08681(17) 0.0526(5) Uani 1 1 d . . .  
H19H 0.8472 0.1984 -0.1529 0.063 Uiso 1 1Calc R . .  
C11C -0.0646(2) 0.12785(19) 0.51938(16) 0.0504(5) Uani 1 1 d . . .  
H11H 0.0426 0.1265 0.5523 0.061 Uiso 1 1Calc R . .  
C4C 0.2261(2) 0.31235(19) 0.44614(17) 0.0505(5) Uani 1 1 d . . .  
C14C -0.3829(3) 0.1325(2) 0.4236(2) 0.0631(6) Uani 1 1 d . . .  
H14H -0.4898 0.1348 0.3916 0.076 Uiso 1 1Calc R . .  
C7C 0.3803(3) 0.5044(3) 0.6354(3) 0.1017(11) Uani 1 1 d . . .  
H7H 0.4329 0.5691 0.6989 0.122 Uiso 1 1Calc R . .  
C9C 0.1623(3) 0.4086(2) 0.4561(2) 0.0635(6) Uani 1 1 d . . .  
H9H 0.0661 0.4088 0.3991 0.076 Uiso 1 1Calc R . .  
C23C 1.1490(3) 0.3299(2) -0.1071(2) 0.0720(7) Uani 1 1 d . . .  
H23AH 1.1285 0.2399 -0.1181 0.108 Uiso 1 1Calc R . .  
H23BH 1.2641 0.3752 -0.0978 0.108 Uiso 1 1Calc R . .  
H23CH 1.0813 0.3536 -0.1756 0.108 Uiso 1 1Calc R . .  
C13C -0.3194(3) 0.1332(2) 0.5448(2) 0.0680(6) Uani 1 1 d . . .  
H13H -0.3832 0.1366 0.5948 0.082 Uiso 1 1Calc R . .  
C24C 1.2420(2) 0.4467(2) 0.0950(2) 0.0647(6) Uani 1 1 d . . .  
H24AH 1.2200 0.5245 0.1055 0.097 Uiso 1 1Calc R . .  
H24BH 1.3451 0.4651 0.0767 0.097 Uiso 1 1Calc R . .  
H24CH 1.2492 0.4070 0.1672 0.097 Uiso 1 1Calc R . .  
C8C 0.2412(3) 0.5052(2) 0.5508(3) 0.0827(8) Uani 1 1 d . . .  
H8H 0.1987 0.5706 0.5564 0.099 Uiso 1 1Calc R . .  
C6C 0.4422(3) 0.4091(4) 0.6269(3) 0.1178(14) Uani 1 1 d . . .  
H6H 0.5365 0.4082 0.6856 0.141 Uiso 1 1Calc R . .  
C5C 0.3668(3) 0.3134(3) 0.5322(2) 0.0910(10) Uani 1 1 d . . .  
H5H 0.4117 0.2494 0.5268 0.109 Uiso 1 1Calc R . .  
H1H 0.1593 0.0459 0.0218 0.063(6) Uiso 1 1 d R . .

loop\_



```

_atom_site_aniso_label
_atom_site_aniso_U_11
_atom_site_aniso_U_22
_atom_site_aniso_U_33
_atom_site_aniso_U_23
_atom_site_aniso_U_13
_atom_site_aniso_U_12
N1 0.0393(8) 0.0495(9) 0.0361(8) -0.0067(6) 0.0096(6) 0.0121(6)
N2 0.0434(8) 0.0502(9) 0.0329(7) -0.0068(6) 0.0118(6) 0.0102(7)
N3 0.0414(8) 0.0480(8) 0.0357(8) -0.0044(6) 0.0105(6) 0.0103(6)
N5 0.0407(8) 0.0499(9) 0.0399(8) -0.0018(7) 0.0132(6) 0.0124(6)
N4 0.0408(8) 0.0546(9) 0.0384(8) -0.0100(7) 0.0136(7) 0.0077(7)
C16 0.0460(10) 0.0483(10) 0.0384(9) -0.0023(8) 0.0139(8) 0.0128(8)
C2 0.0381(9) 0.0467(10) 0.0344(9) -0.0039(7) 0.0078(7) 0.0145(7)
C3 0.0397(9) 0.0433(9) 0.0310(8) -0.0002(7) 0.0086(7) 0.0143(7)
C17 0.0460(10) 0.0438(10) 0.0370(9) 0.0018(7) 0.0134(8) 0.0138(8)
C10 0.0406(9) 0.0405(9) 0.0366(9) -0.0015(7) 0.0114(7) 0.0108(7)
C18 0.0469(11) 0.0532(11) 0.0418(10) -0.0094(8) 0.0127(8) 0.0084(8)
C1 0.0406(9) 0.0419(9) 0.0339(9) -0.0008(7) 0.0104(7) 0.0136(7)
C22 0.0563(11) 0.0468(10) 0.0349(9) 0.0015(8) 0.0156(8) 0.0137(8)
N6 0.0447(9) 0.0638(11) 0.0624(11) -0.0021(9) 0.0165(8) 0.0059(8)
C20 0.0451(10) 0.0440(10) 0.0468(11) 0.0048(8) 0.0124(8) 0.0119(8)
C15 0.0437(10) 0.0522(11) 0.0461(10) 0.0050(8) 0.0131(8) 0.0137(8)
C21 0.0515(11) 0.0454(10) 0.0359(9) -0.0001(8) 0.0063(8) 0.0080(8)
C12 0.0727(15) 0.0712(14) 0.0400(11) 0.0035(10) 0.0235(10) 0.0237(11)
C19 0.0506(11) 0.0563(12) 0.0482(11) -0.0088(9) 0.0212(9) 0.0097(9)
C11 0.0527(11) 0.0614(12) 0.0387(10) 0.0004(9) 0.0134(8) 0.0217(9)
C4 0.0368(9) 0.0634(12) 0.0429(10) -0.0171(9) 0.0110(8) 0.0080(8)
C14 0.0492(12) 0.0776(15) 0.0705(15) 0.0104(12) 0.0250(11) 0.0259(11)
C7 0.0604(15) 0.123(2) 0.092(2) -0.0704(18) 0.0155(15) 0.0018(15)
C9 0.0596(13) 0.0591(13) 0.0640(14) -0.0172(11) 0.0153(11) 0.0140(10)
C23 0.0525(13) 0.0804(16) 0.0830(17) 0.0009(13) 0.0314(12) 0.0130(11)
C13 0.0709(15) 0.0828(16) 0.0662(15) 0.0080(12) 0.0423(12) 0.0284(12)
C24 0.0471(11) 0.0617(13) 0.0669(14) 0.0093(11) 0.0040(10) 0.0048(9)
C8 0.0777(17) 0.0685(15) 0.093(2) -0.0327(14) 0.0325(15) 0.0100(12)
C6 0.0621(16) 0.174(3) 0.087(2) -0.080(2) -0.0185(14) 0.0409(19)
C5 0.0576(14) 0.130(2) 0.0724(16) -0.0511(16) -0.0106(12) 0.0442(15)

```

\_geom\_special\_details

;

All esds (except the esd in the dihedral angle between two l.s. planes) are estimated using the fullCovariance matrix. TheCell esds are taken

into account individually in the estimation of esds in distances, angles and torsion angles; Correlations between esds in Cell parameters are only used when they are defined by Crystal symmetry. An approximate (isotropic) treatment of Cell esds is used for estimating esds involving l.s. planes.

;

loop\_

\_geom\_bond\_atom\_site\_label\_1

\_geom\_bond\_atom\_site\_label\_2

\_geom\_bond\_distance

\_geom\_bond\_site\_symmetry\_2

\_geom\_bond\_publ\_flag

N1C2 1.326(2) . ?

N1C1 1.347(2) . ?

N2N3 1.3335(19) . ?

N2C1 1.351(2) . ?

N3C3 1.335(2) . ?

N5C16 1.282(2) . ?

N5N4 1.380(2) . ?

N4C1 1.349(2) . ?

N4H1 0.9741 . ?

C16C17 1.454(2) . ?

C16H16 0.9300 . ?

C2C3 1.416(2) . ?

C2C4 1.488(2) . ?

C3C10 1.481(2) . ?

C17C18 1.390(2) . ?

C17C22 1.402(2) . ?

C10C15 1.390(2) . ?

C10C11 1.391(2) . ?

C18C19 1.376(3) . ?

C18H18 0.9300 . ?

C22C21 1.373(3) . ?

C22H22 0.9300 . ?

N6C20 1.372(2) . ?

N6C23 1.444(3) . ?

N6C24 1.449(3) . ?

C20C19 1.403(3) . ?

C20C21 1.409(2) . ?

C15C14 1.380(3) . ?

C15H15 0.9300 . ?

C21H21 0.9300 . ?

C12C13 1.372(3) . ?  
C12C11 1.374(3) . ?  
C12H12 0.9300 . ?  
C19H19 0.9300 . ?  
C11H11 0.9300 . ?  
C4C5 1.371(3) . ?  
C4C9 1.381(3) . ?  
C14C13 1.379(3) . ?  
C14H14 0.9300 . ?  
C7C6 1.356(4) . ?  
C7C8 1.358(4) . ?  
C7H7 0.9300 . ?  
C9C8 1.388(3) . ?  
C9H9 0.9300 . ?  
C23H23A 0.9600 . ?  
C23H23B 0.9600 . ?  
C23H23C 0.9600 . ?  
C13H13 0.9300 . ?  
C24H24A 0.9600 . ?  
C24H24B 0.9600 . ?  
C24H24C 0.9600 . ?  
C8H8 0.9300 . ?  
C6C5 1.383(3) . ?  
C6H6 0.9300 . ?  
C5H5 0.9300 . ?

loop\_

\_\_geom\_angle\_atom\_site\_label\_1  
\_\_geom\_angle\_atom\_site\_label\_2  
\_\_geom\_angle\_atom\_site\_label\_3  
\_\_geom\_angle  
\_\_geom\_angle\_site\_symmetry\_1  
\_\_geom\_angle\_site\_symmetry\_3  
\_\_geom\_angle\_publ\_flag  
C2N1C1 115.30(14) . . ?  
N3N2C1 118.32(13) . . ?  
N2N3C3 119.70(14) . . ?  
C16N5N4 113.87(14) . . ?  
C1N4N5 122.56(14) . . ?  
C1N4H1 113.5 . . ?  
N5N4H1 123.9 . . ?  
N5C16C17 123.51(16) . . ?

N5C16H16 118.2...?  
C17C16H16 118.2...?  
N1C2C3 121.23(15)...?  
N1C2C4 116.58(15)...?  
C3C2C4 122.14(14)...?  
N3C3C2 119.73(14)...?  
N3C3C10 116.51(14)...?  
C2C3C10 123.75(14)...?  
C18C17C22 116.53(16)...?  
C18C17C16 119.08(16)...?  
C22C17C16 124.36(16)...?  
C15C10C11 118.82(16)...?  
C15C10C3 119.97(16)...?  
C11C10C3 121.20(16)...?  
C19C18C17 122.16(17)...?  
C19C18H18 118.9...?  
C17C18H18 118.9...?  
N1C1N4 120.68(15)...?  
N1C1N2 125.48(14)...?  
N4C1N2 113.83(14)...?  
C21C22C17 121.96(17)...?  
C21C22H22 119.0...?  
C17C22H22 119.0...?  
C20N6C23 120.72(17)...?  
C20N6C24 121.70(17)...?  
C23N6C24 117.58(17)...?  
N6C20C19 121.49(17)...?  
N6C20C21 122.12(17)...?  
C19C20C21 116.39(16)...?  
C14C15C10 120.39(18)...?  
C14C15H15 119.8...?  
C10C15H15 119.8...?  
C22C21C20 121.44(16)...?  
C22C21H21 119.3...?  
C20C21H21 119.3...?  
C13C12C11 120.6(2)...?  
C13C12H12 119.7...?  
C11C12H12 119.7...?  
C18C19C20 121.51(17)...?  
C18C19H19 119.2...?  
C20C19H19 119.2...?  
C12C11C10 120.22(19)...?

C12C11H11 119.9 .. ?  
C10C11H11 119.9 .. ?  
C5C4C9 118.71(18) .. ?  
C5C4C2 120.87(18) .. ?  
C9C4C2 120.41(18) .. ?  
C13C14C15 120.0(2) .. ?  
C13C14H14 120.0 .. ?  
C15C14H14 120.0 .. ?  
C6C7C8 119.8(2) .. ?  
C6C7H7 120.1 .. ?  
C8C7H7 120.1 .. ?  
C4C9C8 120.3(2) .. ?  
C4C9H9 119.9 .. ?  
C8C9H9 119.9 .. ?  
N6C23H23A 109.5 .. ?  
N6C23H23B 109.5 .. ?  
H23AC23H23B 109.5 .. ?  
N6C23H23C 109.5 .. ?  
H23AC23H23C 109.5 .. ?  
H23BC23H23C 109.5 .. ?  
C12C13C14 119.96(19) .. ?  
C12C13H13 120.0 .. ?  
C14C13H13 120.0 .. ?  
N6C24H24A 109.5 .. ?  
N6C24H24B 109.5 .. ?  
H24AC24H24B 109.5 .. ?  
N6C24H24C 109.5 .. ?  
H24AC24H24C 109.5 .. ?  
H24BC24H24C 109.5 .. ?  
C7C8C9 120.1(2) .. ?  
C7C8H8 119.9 .. ?  
C9C8H8 119.9 .. ?  
C7C6C5 120.8(3) .. ?  
C7C6H6 119.6 .. ?  
C5C6H6 119.6 .. ?  
C4C5C6 120.2(2) .. ?  
C4C5H5 119.9 .. ?  
C6C5H5 119.9 .. ?

loop\_

  \_geom\_torsion\_atom\_site\_label\_1

  \_geom\_torsion\_atom\_site\_label\_2

\_geom\_torsion\_atom\_site\_label\_3  
\_geom\_torsion\_atom\_site\_label\_4  
\_geom\_torsion  
\_geom\_torsion\_site\_symmetry\_1  
\_geom\_torsion\_site\_symmetry\_2  
\_geom\_torsion\_site\_symmetry\_3  
\_geom\_torsion\_site\_symmetry\_4  
\_geom\_torsion\_publ\_flag  
C1N2N3C3 2.4(2) . . . . ?  
C16N5N4C1 -176.36(17) . . . . ?  
N4N5C16C17 -178.61(17) . . . . ?  
C1N1C2C3 4.1(3) . . . . ?  
C1N1C2C4 -173.49(17) . . . . ?  
N2N3C3C2 1.6(3) . . . . ?  
N2N3C3C10 -179.38(15) . . . . ?  
N1C2C3N3 -5.1(3) . . . . ?  
C4C2C3N3 172.36(17) . . . . ?  
N1C2C3C10 175.93(16) . . . . ?  
C4C2C3C10 -6.6(3) . . . . ?  
N5C16C17C18 175.66(18) . . . . ?  
N5C16C17C22 -2.2(3) . . . . ?  
N3C3C10C15 -44.8(2) . . . . ?  
C2C3C10C15 134.26(19) . . . . ?  
N3C3C10C11 135.29(18) . . . . ?  
C2C3C10C11 -45.7(3) . . . . ?  
C22C17C18C19 0.6(3) . . . . ?  
C16C17C18C19 -177.41(19) . . . . ?  
C2N1C1N4 178.75(17) . . . . ?  
C2N1C1N2 0.1(3) . . . . ?  
N5N4C1N1 -0.4(3) . . . . ?  
N5N4C1N2 178.36(16) . . . . ?  
N3N2C1N1 -3.5(3) . . . . ?  
N3N2C1N4 177.80(15) . . . . ?  
C18C17C22C21 -1.1(3) . . . . ?  
C16C17C22C21 176.84(18) . . . . ?  
C23N6C20C19 5.5(3) . . . . ?  
C24N6C20C19 -175.91(19) . . . . ?  
C23N6C20C21 -174.41(19) . . . . ?  
C24N6C20C21 4.2(3) . . . . ?  
C11C10C15C14 2.7(3) . . . . ?  
C3C10C15C14 -177.21(17) . . . . ?  
C17C22C21C20 0.6(3) . . . . ?

N6C20C21C22 -179.71(18) . . . . ?  
 C19C20C21C22 0.4(3) . . . . ?  
 C17C18C19C20 0.3(3) . . . . ?  
 N6C20C19C18 179.26(19) . . . . ?  
 C21C20C19C18 -0.8(3) . . . . ?  
 C13C12C11C10 -1.2(3) . . . . ?  
 C15C10C11C12 -1.2(3) . . . . ?  
 C3C10C11C12 178.75(18) . . . . ?  
 N1C2C4C5 -60.9(3) . . . . ?  
 C3C2C4C5 121.5(2) . . . . ?  
 N1C2C4C9 117.9(2) . . . . ?  
 C3C2C4C9 -59.6(3) . . . . ?  
 C10C15C14C13 -1.9(3) . . . . ?  
 C5C4C9C8 0.9(3) . . . . ?  
 C2C4C9C8 -178.0(2) . . . . ?  
 C11C12C13C14 2.0(4) . . . . ?  
 C15C14C13C12 -0.4(4) . . . . ?  
 C6C7C8C9 0.1(5) . . . . ?  
 C4C9C8C7 -1.0(4) . . . . ?  
 C8C7C6C5 1.0(5) . . . . ?  
 C9C4C5C6 0.2(4) . . . . ?  
 C2C4C5C6 179.0(3) . . . . ?  
 C7C6C5C4 -1.1(5) . . . . ?

\_diffn\_measured\_fraction\_theta\_max 0.855  
 \_diffn\_reflns\_theta\_full 26.00  
 \_diffn\_measured\_fraction\_theta\_full 0.998  
 \_refine\_diff\_density\_max 0.202  
 \_refine\_diff\_density\_min -0.160  
 \_refine\_diff\_density\_rms 0.035

### Molecule 4Cif

data\_c:\nadeem

\_audit\_creation\_method SHELXL-97  
 \_chemical\_name\_systematic  
 ;  
 <i>N</i>-(5,6-Diphenyl-[1,2,4]triazin-3-yl)-<i>N</i>-(2-hydroxy-benzylidene)-  
 hydrazine  
 ;  
 \_chemical\_name\_common

;  
 <i>N</i>-(5,6-Diphenyl-[1,2,4]triazin-3-yl)-<i>N</i>-(2-hydroxy-benzylidene)-  
 hydrazine

;  
 \_chemical\_melting\_point ?  
 \_chemical\_formula\_moiety 'C22H17N5 O'  
 \_chemical\_formula\_sum  
 'C22H17N5 O'  
 \_chemical\_formula\_weight 367.41

loop\_  
 \_atom\_type\_symbol  
 \_atom\_type\_description  
 \_atom\_type\_scatter\_dispersion\_real  
 \_atom\_type\_scatter\_dispersion\_imag  
 \_atom\_type\_scatter\_source  
 'C' 'C' 0.0181 0.0091  
 'International Tables VolC Tables 4.2.6.8 and 6.1.1.4'  
 'H' 'H' 0.0000 0.0000  
 'International Tables VolC Tables 4.2.6.8 and 6.1.1.4'  
 'N' 'N' 0.0311 0.0180  
 'International Tables VolC Tables 4.2.6.8 and 6.1.1.4'  
 'O' 'O' 0.0492 0.0322  
 'International Tables VolC Tables 4.2.6.8 and 6.1.1.4'

\_symmetry\_cell\_setting 'Monoclinic'  
 \_symmetry\_space\_group\_name\_H-M 'P21/c'  
 \_symmetry\_space\_group\_name\_Hall '-P2ybc'

loop\_  
 \_symmetry\_equiv\_pos\_as\_xyz  
 'x, y, z'  
 '-x, y+1/2, -z+1/2'  
 '-x, -y, -z'  
 'x, -y-1/2, z-1/2'

\_cell\_length\_a 14.9753(17)  
 \_cell\_length\_b 6.1220(6)  
 \_cell\_length\_c 21.038(2)  
 \_cell\_angle\_alpha 90.00  
 \_cell\_angle\_beta 103.992(11)  
 \_cell\_angle\_gamma 90.00



\_cell\_volume 1871.6(3)  
 \_cell\_formula\_units\_Z 4  
 \_cell\_measurement\_temperature 296(2)  
 \_cell\_measurement\_reflns\_used 1567  
 \_cell\_measurement\_theta\_min 2.7979  
 \_cell\_measurement\_theta\_max 29.5040

\_exptl\_crystal\_description 'needle'  
 \_exptl\_crystal\_colour 'Yellow'  
 \_exptl\_crystal\_size\_max 0.43  
 \_exptl\_crystal\_size\_mid 0.15  
 \_exptl\_crystal\_size\_min 0.05  
 \_exptl\_crystal\_density\_meas ?  
 \_exptl\_crystal\_density\_diffn 1.304  
 \_exptl\_crystal\_density\_method 'not measured'  
 \_exptl\_crystal\_F\_000 768  
 \_exptl\_absorpt\_coefficient\_mu 0.084  
 \_exptl\_absorpt\_correction\_T\_min 0.68408  
 \_exptl\_absorpt\_correction\_T\_max 1.00000  
 \_exptl\_absorpt\_correction\_type 'multi-scan'  
 \_exptl\_absorpt\_process\_details

;  
 CrysAlisPro, Agilent Technologies,  
 Version 1.171.36.20 (release 27-06-2012CrysAlis171 .NET)  
 (compiled Jul 11 2012,15:38:31)

Empirical absorptionCorrection using sphericalHarmonics,  
 implemented in SCALE3 ABSPACK scaling algorithm.

;

\_exptl\_special\_details ?

\_diffn\_ambient\_temperature 296(2)  
 \_diffn\_radiation\_wavelength 0.71073  
 \_diffn\_radiation\_type MoK\alpha  
 \_diffn\_radiation\_source 'fine-focus sealed tube'  
 \_diffn\_radiation\_monochromator graphite  
 \_diffn\_measurement\_device\_type 'SuperNova, Dual,Cu at zero, Atlas,CCD'  
 \_diffn\_measurement\_method '\w scans'  
 \_diffn\_detector\_area\_resol\_mean ?  
 \_diffn\_standards\_number 0  
 \_diffn\_standards\_interval\_count .  
 \_diffn\_standards\_interval\_time .

```

_diffrn_standards_decay_%      ?
_diffrn_reflns_number          11939
_diffrn_reflns_av_R_equivalents 0.0620
_diffrn_reflns_av_sigmaI/netI  0.0951
_diffrn_reflns_limit_h_min     -19
_diffrn_reflns_limit_h_max     19
_diffrn_reflns_limit_k_min     -8
_diffrn_reflns_limit_k_max     7
_diffrn_reflns_limit_l_min     -29
_diffrn_reflns_limit_l_max     26
_diffrn_reflns_theta_min       2.80
_diffrn_reflns_theta_max       29.57
_reflns_number_total           4597
_reflns_number_gt              1742
_reflns_threshold_expression    >2sigma(I)

_computing_data_collection     'CrysAlis PRO (Agilent, 2012)'
_computing_cell_refinement     'CrysAlis PRO (Agilent, 2012)'
_computing_data_reduction     'CrysAlis PRO (Agilent, 2012)'
_computing_structure_solution  'SHELXS-97 (Sheldrick, 1990)'
_computing_structure_refinement 'SHELXL-97 (Sheldrick, 1997)'
_computing_molecular_graphics  ?
_computing_publication_material ?

_iucr_refine_instructions_details
;
TITL 14097 in P2(1)/c
CELL 0.71073 5.9756 21.5731 14.9805 90.000 93.447 90.000
ZERR 4.0000 0.0018 0.0056 0.0040 0.000 0.022 0.000
LATT 1
SYMM -X, 0.5+Y, 0.5-Z
SFACCHN O
UNIT 92 76 20 4
MERG 2
FMAP 2
GRID
PLAN 20
TEMP 23
SIZE 0.05 0.08 0.48
BOND $H
HTAB
CONF

```

L.S. 20

ACTA 52

WGHT 0.02180 0.00000 0.00000 0.00000 0.00000 0.33330

FVAR 1.69020

O1 4 1.60874 0.41310 0.94281 11.00000 0.07147 0.08726 =  
0.08046 0.00578 -0.02662 -0.00019

N1 3 0.40402 0.35009 0.58890 11.00000 0.04992 0.04967 =  
0.05303 0.00216 -0.00043 -0.00648

N2 3 0.30440 0.43955 0.50047 11.00000 0.05052 0.04896 =  
0.06466 0.00143 -0.00525 -0.00137

N3 3 0.12818 0.40936 0.46126 11.00000 0.04805 0.05515 =  
0.05971 0.00165 -0.00407 0.00092

N4 3 0.62325 0.44122 0.58888 11.00000 0.05869 0.05261 =  
0.06208 0.00461 -0.01612 -0.00987

AFIX 43

H4 2 0.64324 0.47722 0.56601 11.00000 -1.20000

AFIX 0

N5 3 0.77881 0.41939 0.65359 11.00000 0.05624 0.05530 =  
0.05242 -0.00253 -0.00885 0.00159

C1 1 0.43856 0.40747 0.56000 11.00000 0.04820 0.05064 =  
0.04908 -0.00425 0.00275 -0.00286

C2 1 0.22268 0.32186 0.55276 11.00000 0.04271 0.04990 =  
0.04181 -0.00298 0.00426 -0.00114

C3 1 0.08431 0.35113 0.48454 11.00000 0.04319 0.04251 =  
0.04982 -0.00051 0.00565 0.00340

C4 1 0.17969 0.25920 0.58764 11.00000 0.04459 0.04857 =  
0.04099 0.00430 -0.00508 -0.00432

C5 1 0.33970 0.21325 0.58139 11.00000 0.04747 0.05908 =  
0.05816 0.00481 -0.00035 -0.00207

AFIX 43

H5 2 0.47327 0.22209 0.55521 11.00000 -1.20000

AFIX 0

C6 1 0.30303 0.15481 0.61346 11.00000 0.06740 0.05151 =  
0.07096 0.00513 -0.00564 0.00425

AFIX 43

H6 2 0.40982 0.12399 0.60725 11.00000 -1.20000

AFIX 0

C7 1 0.10916 0.14150 0.65477 11.00000 0.08041 0.05691 =  
0.06422 0.01512 -0.00507 -0.01296

AFIX 43

H7 2 0.08485 0.10188 0.67668 11.00000 -1.20000

AFIX 0

C8 1 -0.04866 0.18733 0.66341 11.00000 0.06669 0.07522 =  
 0.06261 0.01322 0.00984 -0.01721

AFIX 43

H8 2 -0.17815 0.17881 0.69264 11.00000 -1.20000

AFIX 0

C9 1 -0.01625 0.24557 0.62917 11.00000 0.05326 0.06124 =  
 0.06158 0.00459 0.00509 -0.00351

AFIX 43

H9 2 -0.12560 0.27588 0.63380 11.00000 -1.20000

AFIX 0

C10 1 -0.10908 0.32283 0.43189 11.00000 0.04671 0.05251 =  
 0.04420 0.00027 0.00045 0.00023

C11 1 -0.12049 0.26099 0.40957 11.00000 0.05002 0.06235 =  
 0.05891 0.00293 -0.00613 -0.00107

AFIX 43

H11 2 -0.00533 0.23465 0.43001 11.00000 -1.20000

AFIX 0

C12 1 -0.29937 0.23697 0.35738 11.00000 0.06126 0.06120 =  
 0.07264 -0.00545 -0.00166 -0.00994

AFIX 43

H12 2 -0.30288 0.19512 0.34249 11.00000 -1.20000

AFIX 0

C13 1 -0.47277 0.27576 0.32758 11.00000 0.05370 0.08541 =  
 0.05614 0.00288 -0.00703 -0.01153

AFIX 43

H13 2 -0.59508 0.25983 0.29373 11.00000 -1.20000

AFIX 0

C14 1 -0.46381 0.33783 0.34811 11.00000 0.05198 0.07977 =  
 0.05177 0.00622 -0.00326 0.00377

AFIX 43

H14 2 -0.57878 0.36412 0.32732 11.00000 -1.20000

AFIX 0

C15 1 -0.28347 0.36109 0.39974 11.00000 0.05158 0.06109 =  
 0.04589 0.00039 0.00136 0.00749

AFIX 43

H15 2 -0.27852 0.40316 0.41328 11.00000 -1.20000

AFIX 0

C16 1 0.93780 0.45812 0.67206 11.00000 0.05638 0.05521 =  
 0.05547 -0.00234 -0.00732 -0.00541

AFIX 43

H16 2 0.94002 0.49535 0.64084 11.00000 -1.20000

AFIX 0

```

C17  1  1.11498  0.44529  0.74065  11.00000  0.05349  0.04754 =
      0.04661 -0.00213 -0.00032 -0.00167
C18  1  1.12508  0.39093  0.79028  11.00000  0.05679  0.05639 =
      0.06396 -0.00294 -0.00697 -0.00507
AFIX 43
H18  2  1.01849  0.36013  0.77846  11.00000 -1.20000
AFIX 0
C19  1  1.29145  0.38206  0.85696  11.00000  0.06806  0.05696 =
      0.06783  0.00846 -0.00691 -0.00011
AFIX 43
H19  2  1.29513  0.34567  0.89031  11.00000 -1.20000
AFIX 0
C20  1  1.45299  0.42720  0.87435  11.00000  0.05667  0.06206 =
      0.05572 -0.00543 -0.01090  0.00618
C21  1  1.44882  0.48071  0.82603  11.00000  0.06194  0.05952 =
      0.06587 -0.00923 -0.01070 -0.00939
AFIX 43
H21  2  1.55791  0.51094  0.83713  11.00000 -1.20000
AFIX 0
C22  1  1.27842  0.48933  0.75977  11.00000  0.06931  0.04814 =
      0.06232  0.00361 -0.00772 -0.00766
AFIX 43
H22  2  1.27448  0.52606  0.72722  11.00000 -1.20000
AFIX 0
C23  1  1.78566  0.45639  0.96182  11.00000  0.06311  0.10751 =
      0.08569 -0.02149 -0.01883 -0.00220
AFIX 137
H23A  2  1.87234  0.46079  0.91027  11.00000 -1.50000
H23B  2  1.88034  0.44169  1.01138  11.00000 -1.50000
H23C  2  1.72336  0.49584  0.97659  11.00000 -1.50000
HKLF 4

```

```
;
```

```
_refine_special_details
```

```
;
```

Refinement of  $F^2$  against ALL reflections. The weighted R-factor  $wR$  and goodness of fit  $S$  are based on  $F^2$ , Conventional R-factors  $R$  are based on  $F$ , with  $F$  set to zero for Negative  $F^2$ . The threshold expression of  $F^2 > 2\sigma(F^2)$  is used only for Calculating R-factors(gt) etc. and is Not relevant to the Choice of reflections for refinement. R-factors based on  $F^2$  are statistically about twice as large as those based on  $F$ , and R-factors based on ALL data will be even larger.

```
;
```

```

_refine_ls_structure_factor_coef Fsqd
_refine_ls_matrix_type full
_refine_ls_weighting_scheme Calc
_refine_ls_weighting_details
'calc w=1/[\s^2^(Fo^2^)+(0.0576P)^2^+0.0000P] where P=(Fo^2^+2Fc^2^)/3'
_atom_sites_solution_primary direct
_atom_sites_solution_secondary difmap
_atom_sites_solution_hydrogens geom
_refine_ls_hydrogen_treatment mixed
_refine_ls_extinction_method None
_refine_ls_extinction_coef ?
_refine_ls_number_reflns 4597
_refine_ls_number_parameters 257
_refine_ls_number_restraints 0
_refine_ls_R_factor_all 0.1878
_refine_ls_R_factor_gt 0.0598
_refine_ls_wR_factor_ref 0.1683
_refine_ls_wR_factor_gt 0.1240
_refine_ls_goodness_of_fit_ref 0.955
_refine_ls_restrained_S_all 0.955
_refine_ls_shift/su_max 0.000
_refine_ls_shift/su_mean 0.000

```

loop\_

```

_atom_site_label
_atom_site_type_symbol
_atom_site_fract_x
_atom_site_fract_y
_atom_site_fract_z
_atom_site_U_iso_or_equiv
_atom_site_adp_type
_atom_site_occupancy
_atom_site_symmetry_multiplicity
_atom_site_calc_flag
_atom_site_refinement_flags
_atom_site_disorder_assembly
_atom_site_disorder_group
N1N 0.24100(16) 0.9759(3) 0.02249(10) 0.0594(6) Uani 1 1 d . . .
N3N 0.14906(16) 1.2823(4) 0.07838(11) 0.0631(6) Uani 1 1 d . . .
C2C 0.28801(18) 1.1305(4) 0.06162(11) 0.0519(7) Uani 1 1 d . . .
N2N 0.10195(16) 1.1322(4) 0.03740(11) 0.0656(6) Uani 1 1 d . . .

```

C3C 0.24111(18) 1.2833(4) 0.09301(12) 0.0524(7) Uani 1 1 d . . .  
N5N 0.13020(17) 0.6597(4) -0.05376(11) 0.0660(6) Uani 1 1 d . . .  
C1C 0.1496(2) 0.9805(5) 0.01395(13) 0.0592(7) Uani 1 1 d . . .  
C4C 0.38883(19) 1.1287(4) 0.06992(11) 0.0527(7) Uani 1 1 d . . .  
N4N 0.09520(19) 0.8212(4) -0.02047(12) 0.0741(7) Uani 1 1 d . . .  
C15C 0.2389(2) 1.6421(4) 0.14746(13) 0.0616(7) Uani 1 1 d . . .  
H15H 0.1844 1.6726 0.1166 0.074 Uiso 1 1Calc R . .  
C10C 0.28417(18) 1.4457(4) 0.14384(12) 0.0505(6) Uani 1 1 d . . .  
C9C 0.4370(2) 1.3147(4) 0.06129(13) 0.0619(7) Uani 1 1 d . . .  
H9H 0.4059 1.4465 0.0512 0.074 Uiso 1 1Calc R . .  
C16C 0.0711(2) 0.5232(4) -0.08416(13) 0.0645(8) Uani 1 1 d . . .  
H16H 0.0104 0.5364 -0.0812 0.077 Uiso 1 1Calc R . .  
C11C 0.36520(19) 1.4045(5) 0.19072(12) 0.0624(8) Uani 1 1 d . . .  
H11H 0.3964 1.2737 0.1896 0.075 Uiso 1 1Calc R . .  
C17C 0.0950(2) 0.3477(4) -0.12331(13) 0.0605(7) Uani 1 1 d . . .  
C22C 0.0277(2) 0.1973(5) -0.15222(14) 0.0733(9) Uani 1 1 d . . .  
H22H -0.0308 0.2092 -0.1448 0.088 Uiso 1 1Calc R . .  
C7C 0.5771(2) 1.1122(6) 0.08330(14) 0.0748(9) Uani 1 1 d . . .  
H7H 0.6403 1.1065 0.0874 0.090 Uiso 1 1Calc R . .  
C14C 0.2736(2) 1.7923(5) 0.19612(15) 0.0711(9) Uani 1 1 d . . .  
H14H 0.2425 1.9226 0.1980 0.085 Uiso 1 1Calc R . .  
C12C 0.3999(2) 1.5565(6) 0.23906(13) 0.0764(9) Uani 1 1 d . . .  
H12H 0.4546 1.5282 0.2699 0.092 Uiso 1 1Calc R . .  
O1 O 0.25154(16) 0.4654(4) -0.10809(15) 0.1261(10) Uani 1 1 d . . .  
H1H 0.2336 0.5543 -0.0848 0.151 Uiso 1 1Calc R . .  
C5C 0.4365(2) 0.9344(5) 0.08544(13) 0.0644(8) Uani 1 1 d . . .  
H5H 0.4049 0.8076 0.0909 0.077 Uiso 1 1Calc R . .  
C8C 0.5308(2) 1.3060(6) 0.06764(14) 0.0721(9) Uani 1 1 d . . .  
H8H 0.5627 1.4313 0.0613 0.086 Uiso 1 1Calc R . .  
C13C 0.3538(3) 1.7491(6) 0.24151(15) 0.0804(10) Uani 1 1 d . . .  
H13H 0.3772 1.8506 0.2742 0.096 Uiso 1 1Calc R . .  
C18C 0.1816(2) 0.3283(6) -0.13547(17) 0.0848(10) Uani 1 1 d . . .  
C6C 0.5308(2) 0.9282(5) 0.09282(14) 0.0731(8) Uani 1 1 d . . .  
H6H 0.5627 0.7981 0.1043 0.088 Uiso 1 1Calc R . .  
C21C 0.0456(3) 0.0312(5) -0.19158(17) 0.0931(11) Uani 1 1 d . . .  
H21H 0.0001 -0.0690 -0.2102 0.112 Uiso 1 1Calc R . .  
C19C 0.1992(3) 0.1626(7) -0.1761(2) 0.1140(13) Uani 1 1 d . . .  
H19H 0.2568 0.1512 -0.1850 0.137 Uiso 1 1Calc R . .  
C20C 0.1315(3) 0.0167(7) -0.20273(19) 0.1083(13) Uani 1 1 d . . .  
H20H 0.1442 -0.0952 -0.2291 0.130 Uiso 1 1Calc R . .  
H10H 0.019(3) 0.810(5) -0.0309(15) 0.107(11) Uiso 1 1 d . . .

loop\_

\_atom\_site\_aniso\_label

\_atom\_site\_aniso\_U\_11

\_atom\_site\_aniso\_U\_22

\_atom\_site\_aniso\_U\_33

\_atom\_site\_aniso\_U\_23

\_atom\_site\_aniso\_U\_13

\_atom\_site\_aniso\_U\_12

N1 0.0526(16) 0.0672(14) 0.0538(13) -0.0064(11) 0.0040(11) -0.0122(13)  
 N3 0.0500(16) 0.0739(15) 0.0629(14) -0.0089(12) 0.0088(12) -0.0101(13)  
 C2 0.0500(18) 0.0617(16) 0.0418(13) 0.0004(13) 0.0069(13) -0.0089(14)  
 N2 0.0454(15) 0.0769(16) 0.0698(15) -0.0158(14) 0.0047(12) -0.0136(13)  
 C3 0.0393(17) 0.0662(17) 0.0489(15) -0.0003(13) 0.0054(12) -0.0095(14)  
 N5 0.0576(16) 0.0661(14) 0.0672(15) -0.0087(13) 0.0016(13) -0.0039(13)  
 C1 0.0496(19) 0.0700(19) 0.0517(15) -0.0033(14) 0.0003(14) -0.0093(17)  
 C4 0.0485(18) 0.0649(17) 0.0447(14) -0.0089(13) 0.0110(12) -0.0094(15)  
 N4 0.0562(18) 0.0772(16) 0.0805(17) -0.0267(14) 0.0001(14) -0.0171(15)  
 C15 0.0598(19) 0.0673(18) 0.0581(17) -0.0003(15) 0.0147(15) -0.0107(16)  
 C10 0.0487(17) 0.0616(16) 0.0431(14) -0.0012(13) 0.0147(13) -0.0106(15)  
 C9 0.059(2) 0.0693(18) 0.0593(16) -0.0039(14) 0.0190(15) -0.0092(16)  
 C16 0.0554(19) 0.0680(18) 0.0627(17) -0.0115(15) 0.0000(15) -0.0068(16)  
 C11 0.0519(18) 0.087(2) 0.0456(15) -0.0058(15) 0.0072(13) -0.0060(16)  
 C17 0.0529(19) 0.0639(17) 0.0611(17) -0.0006(15) 0.0069(14) 0.0039(15)  
 C22 0.070(2) 0.0732(19) 0.0729(19) -0.0166(17) 0.0089(17) -0.0055(18)  
 C7 0.055(2) 0.106(3) 0.0648(19) -0.0170(19) 0.0160(16) -0.005(2)  
 C14 0.082(3) 0.0650(19) 0.071(2) -0.0086(17) 0.029(2) -0.0128(18)  
 C12 0.066(2) 0.105(2) 0.0530(18) -0.0089(18) 0.0038(15) -0.017(2)  
 O1 0.0523(16) 0.144(2) 0.179(3) -0.044(2) 0.0222(16) -0.0111(16)  
 C5 0.059(2) 0.0665(19) 0.0653(18) -0.0097(15) 0.0098(15) -0.0061(16)  
 C8 0.061(2) 0.090(2) 0.070(2) -0.0072(17) 0.0259(16) -0.0183(19)  
 C13 0.098(3) 0.088(2) 0.0569(19) -0.0215(18) 0.022(2) -0.030(2)  
 C18 0.054(2) 0.096(2) 0.097(2) -0.010(2) 0.0039(19) 0.007(2)  
 C6 0.060(2) 0.083(2) 0.074(2) -0.0125(17) 0.0105(16) 0.0058(18)  
 C21 0.098(3) 0.081(2) 0.096(3) -0.027(2) 0.015(2) 0.004(2)  
 C19 0.080(3) 0.130(3) 0.133(3) -0.028(3) 0.028(3) 0.027(3)  
 C20 0.103(4) 0.111(3) 0.107(3) -0.029(2) 0.018(3) 0.031(3)

\_geom\_special\_details

;

All esds (except the esd in the dihedral angle between two l.s. planes) are estimated using the fullCovariance matrix. TheCell esds are taken into account individually in the estimation of esds in distances, angles



and torsion angles;Correlations between esds inCell parameters are only used when they are defined byCrystal symmetry. An approximate (isotropic) treatment ofCell esds is used for estimating esds involving l.s. planes.

;

loop\_

\_geom\_bond\_atom\_site\_label\_1

\_geom\_bond\_atom\_site\_label\_2

\_geom\_bond\_distance

\_geom\_bond\_site\_symmetry\_2

\_geom\_bond\_publ\_flag

N1C1 1.336(3) . ?

N1C2 1.337(3) . ?

N3N2 1.338(3) . ?

N3C3 1.338(3) . ?

C2C3 1.424(3) . ?

C2C4 1.477(4) . ?

N2C1 1.337(3) . ?

C3C10 1.488(3) . ?

N5C16 1.271(3) . ?

N5N4 1.386(3) . ?

C1N4 1.362(3) . ?

C4C9 1.383(3) . ?

C4C5 1.385(4) . ?

N4H10 1.11(4) . ?

C15C14 1.381(4) . ?

C15C10 1.392(3) . ?

C15H15 0.9300 . ?

C10C11 1.389(4) . ?

C9C8 1.380(4) . ?

C9H9 0.9300 . ?

C16C17 1.450(4) . ?

C16H16 0.9300 . ?

C11C12 1.384(4) . ?

C11H11 0.9300 . ?

C17C18 1.386(4) . ?

C17C22 1.392(4) . ?

C22C21 1.378(4) . ?

C22H22 0.9300 . ?

C7C6 1.362(4) . ?

C7C8 1.373(4) . ?

C7H7 0.9300 . ?

C14C13 1.367(4) . ?  
C14H14 0.9300 . ?  
C12C13 1.374(4) . ?  
C12H12 0.9300 . ?  
O1C18 1.357(4) . ?  
O1H1 0.8200 . ?  
C5C6 1.384(4) . ?  
C5H5 0.9300 . ?  
C8H8 0.9300 . ?  
C13H13 0.9300 . ?  
C18C19 1.392(5) . ?  
C6H6 0.9300 . ?  
C21C20 1.365(5) . ?  
C21H21 0.9300 . ?  
C19C20 1.366(5) . ?  
C19H19 0.9300 . ?  
C20H20 0.9300 . ?

loop\_

\_geom\_angle\_atom\_site\_label\_1  
\_geom\_angle\_atom\_site\_label\_2  
\_geom\_angle\_atom\_site\_label\_3  
\_geom\_angle  
\_geom\_angle\_site\_symmetry\_1  
\_geom\_angle\_site\_symmetry\_3  
\_geom\_angle\_publ\_flag  
C1N1C2 115.9(2) . . ?  
N2N3C3 120.3(2) . . ?  
N1C2C3 120.3(2) . . ?  
N1C2C4 116.0(2) . . ?  
C3C2C4 123.7(2) . . ?  
C1N2N3 118.0(2) . . ?  
N3C3C2 119.1(2) . . ?  
N3C3C10 114.3(2) . . ?  
C2C3C10 126.5(2) . . ?  
C16N5N4 114.9(2) . . ?  
N1C1N2 125.9(3) . . ?  
N1C1N4 121.2(3) . . ?  
N2C1N4 112.9(3) . . ?  
C9C4C5 118.9(3) . . ?  
C9C4C2 121.9(3) . . ?  
C5C4C2 119.2(2) . . ?

C1N4N5 121.9(3) .. ?  
C1N4H10 127.2(16) .. ?  
N5N4H10 110.5(16) .. ?  
C14C15C10 121.0(3) .. ?  
C14C15H15 119.5 .. ?  
C10C15H15 119.5 .. ?  
C11C10C15 118.1(2) .. ?  
C11C10C3 122.8(2) .. ?  
C15C10C3 119.0(2) .. ?  
C8C9C4 120.4(3) .. ?  
C8C9H9 119.8 .. ?  
C4C9H9 119.8 .. ?  
N5C16C17 122.4(3) .. ?  
N5C16H16 118.8 .. ?  
C17C16H16 118.8 .. ?  
C12C11C10 120.5(3) .. ?  
C12C11H11 119.7 .. ?  
C10C11H11 119.7 .. ?  
C18C17C22 118.3(3) .. ?  
C18C17C16 122.6(3) .. ?  
C22C17C16 119.1(3) .. ?  
C21C22C17 121.7(3) .. ?  
C21C22H22 119.2 .. ?  
C17C22H22 119.2 .. ?  
C6C7C8 120.3(3) .. ?  
C6C7H7 119.8 .. ?  
C8C7H7 119.8 .. ?  
C13C14C15 119.9(3) .. ?  
C13C14H14 120.0 .. ?  
C15C14H14 120.0 .. ?  
C13C12C11 120.1(3) .. ?  
C13C12H12 119.9 .. ?  
C11C12H12 119.9 .. ?  
C18 O1H1 109.5 .. ?  
C6C5C4 120.2(3) .. ?  
C6C5H5 119.9 .. ?  
C4C5H5 119.9 .. ?  
C7C8C9 120.0(3) .. ?  
C7C8H8 120.0 .. ?  
C9C8H8 120.0 .. ?  
C14C13C12 120.3(3) .. ?  
C14C13H13 119.9 .. ?

C12C13H13 119.9 .. ?  
O1C18C17 121.9(3) .. ?  
O1C18C19 118.0(3) .. ?  
C17C18C19 120.0(3) .. ?  
C7C6C5 120.2(3) .. ?  
C7C6H6 119.9 .. ?  
C5C6H6 119.9 .. ?  
C20C21C22 118.7(4) .. ?  
C20C21H21 120.7 .. ?  
C22C21H21 120.7 .. ?  
C20C19C18 119.8(4) .. ?  
C20C19H19 120.1 .. ?  
C18C19H19 120.1 .. ?  
C21C20C19 121.6(4) .. ?  
C21C20H20 119.2 .. ?  
C19C20H20 119.2 .. ?

loop\_

\_\_geom\_torsion\_atom\_site\_label\_1  
\_\_geom\_torsion\_atom\_site\_label\_2  
\_\_geom\_torsion\_atom\_site\_label\_3  
\_\_geom\_torsion\_atom\_site\_label\_4  
\_\_geom\_torsion  
\_\_geom\_torsion\_site\_symmetry\_1  
\_\_geom\_torsion\_site\_symmetry\_2  
\_\_geom\_torsion\_site\_symmetry\_3  
\_\_geom\_torsion\_site\_symmetry\_4  
\_\_geom\_torsion\_publ\_flag  
C1N1C2C3 1.9(3) . . . . ?  
C1N1C2C4 -178.7(2) . . . . ?  
C3N3N2C1 2.5(3) . . . . ?  
N2N3C3C2 3.5(3) . . . . ?  
N2N3C3C10 -174.5(2) . . . . ?  
N1C2C3N3 -5.8(3) . . . . ?  
C4C2C3N3 174.8(2) . . . . ?  
N1C2C3C10 171.9(2) . . . . ?  
C4C2C3C10 -7.4(4) . . . . ?  
C2N1C1N2 4.5(4) . . . . ?  
C2N1C1N4 -174.6(2) . . . . ?  
N3N2C1N1 -6.9(4) . . . . ?  
N3N2C1N4 172.3(2) . . . . ?  
N1C2C4C9 129.3(2) . . . . ?

C3C2C4C9 -51.3(3) . . . . ?  
 N1C2C4C5 -49.3(3) . . . . ?  
 C3C2C4C5 130.1(3) . . . . ?  
 N1C1N4N5 -6.6(4) . . . . ?  
 N2C1N4N5 174.1(2) . . . . ?  
 C16N5N4C1 -179.4(2) . . . . ?  
 C14C15C10C11 0.2(4) . . . . ?  
 C14C15C10C3 176.3(2) . . . . ?  
 N3C3C10C11 143.3(2) . . . . ?  
 C2C3C10C11 -34.6(4) . . . . ?  
 N3C3C10C15 -32.6(3) . . . . ?  
 C2C3C10C15 149.5(2) . . . . ?  
 C5C4C9C8 0.4(4) . . . . ?  
 C2C4C9C8 -178.2(2) . . . . ?  
 N4N5C16C17 178.0(2) . . . . ?  
 C15C10C11C12 -0.7(4) . . . . ?  
 C3C10C11C12 -176.6(2) . . . . ?  
 N5C16C17C18 -6.3(4) . . . . ?  
 N5C16C17C22 176.5(3) . . . . ?  
 C18C17C22C21 0.6(4) . . . . ?  
 C16C17C22C21 178.0(3) . . . . ?  
 C10C15C14C13 0.2(4) . . . . ?  
 C10C11C12C13 0.7(4) . . . . ?  
 C9C4C5C6 0.7(4) . . . . ?  
 C2C4C5C6 179.3(2) . . . . ?  
 C6C7C8C9 -0.2(4) . . . . ?  
 C4C9C8C7 -0.7(4) . . . . ?  
 C15C14C13C12 -0.2(4) . . . . ?  
 C11C12C13C14 -0.2(4) . . . . ?  
 C22C17C18 O1 -178.6(3) . . . . ?  
 C16C17C18 O1 4.1(5) . . . . ?  
 C22C17C18C19 0.5(5) . . . . ?  
 C16C17C18C19 -176.8(3) . . . . ?  
 C8C7C6C5 1.3(4) . . . . ?  
 C4C5C6C7 -1.6(4) . . . . ?  
 C17C22C21C20 -0.7(5) . . . . ?  
 O1C18C19C20 177.7(4) . . . . ?  
 C17C18C19C20 -1.4(6) . . . . ?  
 C22C21C20C19 -0.2(6) . . . . ?  
 C18C19C20C21 1.2(6) . . . . ?

\_diffn\_measured\_fraction\_theta\_max 0.874

\_diffn\_reflns\_theta\_full 26.00  
\_diffn\_measured\_fraction\_theta\_full 0.999  
\_refine\_diff\_density\_max 0.129  
\_refine\_diff\_density\_min -0.161  
\_refine\_diff\_density\_rms 0.035
